## Phase separation of +TIP-networks regulates microtubule dynamics

Julie Miesch<sup>1#</sup>, Robert T. Wimbish<sup>1#</sup>, Marie-Claire Velluz<sup>1</sup>, Charlotte Aumeier<sup>1,2\*</sup>

<sup>1</sup>Department of Biochemistry, University of Geneva, 1211 Geneva, Switzerland

<sup>2</sup>National Center for Competence in Research Chemical Biology, University of Geneva, 1211 Geneva, Switzerland

# equal contribution

\*Correspondence to: [Charlotte.aumeier@unige.ch](mailto:Charlotte.aumeier@unige.ch)

### SUMMARY

1 Regulation of microtubule dynamics is essential for diverse cellular functions, and proteins that  
2 bind to dynamic microtubule ends can regulate network dynamics. Here we show that two  
3 conserved microtubule end-binding proteins, CLIP-170 and EB3, undergo phase separation and  
4 form dense liquid-networks. When CLIP-170 and EB3 act together the multivalency of the  
5 network increases, which synergistically increases the amount of protein in the dense phase. *In*  
6 *vitro* and in cells these liquid networks can condense tubulin. *In vitro* in the presence of  
7 microtubules, EB3/CLIP-170 phase separation can co-condense tubulin all along the microtubule.  
8 At this condition microtubule growth speed increases up to two-fold and depolymerization events  
9 are strongly reduced, compared to conditions with phase separation deficient networks. Our data  
10 show that phase separated EB3/CLIP-170 networks impact microtubule growth dynamics beyond  
11 direct protein-microtubule interactions.

Keywords: Microtubule, CLIP-170, EB3, microtubule dynamics, tubulin condensation, *in vitro*, liquid-liquid phase separation

### Introduction

12 The microtubule cytoskeleton engages in a plethora of cellular processes, from organelle transport  
13 to cell division. To do so, the network dynamically modifies its structure in response to external  
14 cues and adapts its architecture to specific cellular functions. Microtubules themselves are highly  
15 dynamic polymers that can rapidly cycle between phases of polymerization and depolymerization,  
16 a characteristic which is critical for cytoskeletal re-organization (reviewed in Brouhard and Rice,  
17 2018). In cells, microtubules polymerize at their plus-end by addition of GTP-tubulin. After GTP-  
18 tubulin addition, GTP is gradually hydrolyzed, resulting in a GDP-tubulin shaft behind the tip.  
19 Once the stabilizing GTP-tubulin “cap” disappears from the plus-end, the microtubule switches  
20 from growing to shrinking, an event termed catastrophe (Howard and Hyman, 2009; Brouhard et  
21 al., 2015; Gudimchuk and McIntosh, 2021). Conversely, microtubules can stop shrinking and  
22 switch to regrowth, an event termed rescue. The balance between growth and shrinkage is

23 intimately linked to the addition of free tubulin to the growing microtubule (Walker et al., 1988;  
24 Voter et al., 1991).

25 In addition to these intrinsic modes of regulation, microtubule dynamics can be fine-tuned by Plus  
26 Tip-Interacting Proteins (+TIPs) (reviewed in Akhmanova and Steinmetz, 2010). +TIPs are  
27 functionally independent and structurally diverse microtubule regulators that concentrate at  
28 growing microtubule ends while exhibiting a weak affinity for the microtubule shaft. It is generally  
29 accepted that the unique localization of +TIPs at microtubule ends results from their specific  
30 binding to the GTP-tubulin cap (Akhmanova and Steinmetz, 2015).

31 Key integrators of +TIP-networks are the End-Binding proteins (EBs), as they autonomously bind  
32 to GTP-tubulin at growing microtubule ends and recruit a battery of non-autonomously binding  
33 +TIPs (reviewed in Galjart, 2010). Within the EB family, higher eukaryotes express three proteins  
34 termed EB1, EB2, and EB3. These proteins increase microtubule plus-end dynamics by promoting  
35 catastrophes and increasing growth speed *in vitro* (Bieling et al., 2008; Vitre et al., 2008;  
36 Komorova et al., 2009; Montenegro Gouveia et al., 2010).

37 A key accessory protein recruited to plus ends by the EBs is the Cytoplasmic Linker Protein of  
38 170 kDa (CLIP-170), which increases microtubule rescue frequency and growth speeds (Perez et  
39 al., 1999; Arnal et al., 2004; Bieling et al., 2007; Bieling et al., 2008; Komorova et al., 2002, 2005).  
40 CLIP-170 consists of a microtubule binding “head” domain in its N-terminus, followed by a central  
41 coiled-coil region and a zinc-knuckle domain, hereafter referred to as the “C-terminal region”  
42 (Pierre et al., 1992; Pierre et al., 1994; Diamantopolous et al., 1999). Most studies of CLIP-170  
43 function *in vitro* have focused on truncated versions, containing only the monomeric head domain  
44 (H1) or the head domain with a small extension that allows dimerization (H2) (Figure 1A); thus,  
45 it is unclear how full-length CLIP-170 contributes to microtubule dynamics.

46  
47 Early studies of CLIP-170 expression in cells revealed that in addition to its microtubule plus-end  
48 localization, it also formed cytoplasmic “patches” that co-localized with EB1 and the dynein-  
49 activating protein dynactin (Pierre et al., 1994; Goodson et al., 2003). Based on the physical  
50 properties of these CLIP-170 patches, it has recently been suggested that they form by liquid-liquid  
51 phase separation (LLPS) (Wu et al., 2021; Jijumon et al., 2022).

52  
53 LLPS is the process by which molecules spontaneously condense into droplets and de-mix from  
54 their surrounding solution, resulting in the co-existence of two unique liquid phases (reviewed in  
55 Boeynaems et al., 2018; Hyman et al., 2014; Shin and Brangwynne, 2017). Recently, LLPS has  
56 been implicated in driving microtubule-related processes, including spindle assembly (Jiang et al.,  
57 2015), nucleation of acentrosomal and branched microtubules (Hernández-Vega et al., 2017; King  
58 and Petry, 2020), and centrosome maturation (Woodruff et al., 2017; Jiang et al., 2021). A key  
59 shared feature of these processes is the co-condensation of tubulin with LLPS-potent microtubule-

60 associated proteins to catalyze biochemical reactions. Along these lines, condensation of a  
61 microtubule +TIP-network has been proposed based on transient multivalent interactions between  
62 the +TIPs (Akhmanova and Steinmetz, 2015; Wu et al., 2021). Despite this, LLPS of +TIPs and  
63 its function is still unclear.

64 +TIPs concentrate at the growing GTP-microtubule tip. A combination of *in vivo*, *in vitro* and *in*  
65 *silico* work has indicated that the GTP-tubulin cap size is 1-60 tubulin layers, indicating a length  
66 of < 500 nm (Voter et al., 1991; Walker et al., 1988; Drechsel and Kirschner, 1994; Schek et al.,  
67 2007, Seepatun et al. 2012; Rickman et al., 2017). Puzzlingly, in cells +TIP networks bind to a  
68 region at the microtubule end up to 4-fold longer than this, with network lengths up to 2  $\mu\text{m}$   
69 (Komarova et al. 2009; Seepatun et al., 2012; Roth et al. 2019). The discrepancies between +TIP  
70 network profiles *in vitro* and in cells could be due to different sizes of the GTP-cap, but also  
71 prompts the question of whether network densities and organizational properties could impact  
72 network extension.

73 Interestingly, overexpressed EB3 and CLIP-170 exhibit atypical network formation at the growing  
74 microtubule tip. Both proteins leave trailing protein “foci” behind the leading network edge  
75 (Mustyatsa et al., 2019; Henrie et al., 2020, Komarova et al. 2009, Nakamura et al. 2012, Mohan  
76 et al., 2013). One explanation for these foci is that they form by binding to tubulin remaining in  
77 the GTP-state behind the GTP-cap (Perez et al., 1999; de Forges et al., 2016; Henrie et al., 2020).  
78 As overexpressed CLIP-170 has the potential to undergo LLPS (Wu et al., 2021; Jijumon et al.,  
79 2022), another possibility would be that CLIP-170 foci split off from the leading network in a  
80 process resembling fission of condensates.

81  
82 In this study, we use tandem in-cell and *in vitro* approaches to investigate +TIP condensation and  
83 their function. We provide evidence that +TIP networks in cells may have liquid properties. We  
84 demonstrate that the +TIPs EB3 and CLIP-170 undergo LLPS at nanomolar concentrations in the  
85 absence of crowding agents. The EB3 and CLIP-170-containing droplets co-condense tubulin, and  
86 depend on protein regions promoting multivalent interactions. In the presence of microtubules,  
87 EB3/CLIP-170 promote rapid growth speeds while reducing catastrophe and pausing frequencies  
88 at the microtubule plus-end. Taken together, our results suggest a mechanism whereby +TIP LLPS  
89 plays a role in regulating microtubule dynamics.

## 90 91 **Results**

### 92 *+TIP-networks exhibit properties reminiscent of phase separation*

93 We first studied if +TIP-network profiles with trailing protein foci could result from LLPS, by  
94 overexpressing GFP-CLIP-170 in RPE-1 cells. Analysis of plus-end fluorescence intensity profiles  
95 in cells revealed that 80 % of the GFP-CLIP-170 networks left behind foci (Figures 1B and C).  
96 Dynamic analysis of CLIP-170 networks showed that the remaining protein foci bound to the  
97 microtubule shaft dissolved over time (Figure 1D and Movie 1). We next probed the material

98 properties of +TIP-networks by treating cells with the aliphatic alcohol 1,6-hexanediol to reduce  
99 hydrophobic interactions (Kroschwald et al., 2017). While untreated cells exhibited 3  $\mu\text{m}$  long  
100 +TIP-networks, upon hexanediol treatment, the profile of the +TIP-network reduced to  $\sim 1.5 \mu\text{m}$   
101 foci (Figures S1A, B and Movie 2), indicating that hydrophobic interactions influence +TIP  
102 network organization.

103  
104 To rule out that the observed foci formation is not an artefact of overexpression, we measured  
105 plus-end fluorescence intensity profiles of endogenous CLIP-170. In line with overexpression  
106 studies, we observed that for endogenous CLIP-170,  $\sim 70\%$  of the +TIP-networks had foci (Figures  
107 1B and C). EB3, another prominent +TIP, followed a comparable fluorescence profile, with  $\sim 75\%$   
108 of the endogenous EB3 networks having foci (Figures 1B and C), consistent with an  
109 overexpression-based study (Mustyatsa et al., 2019). Co-staining of EB3 and CLIP-170 revealed  
110 that most networks displayed fluorescence profiles with distinct EB3 and CLIP-170 foci co-  
111 localization (Figure 1F).

112  
113 When we overexpressed the CLIP-170 truncated H2- and H1-mutants (Figure 1A), both tracked  
114 the growing GTP-microtubule tip, as previously reported (Figure 1E) (Komarova et al., 2002;  
115 Folker et al., 2005). However, the presence of foci behind the leading edge of the H2- and H1-  
116 networks was dramatically reduced compared to CLIP-170 (Figure 1C). This suggests that the C-  
117 terminal region of CLIP-170 influences network organization at microtubule ends. Since H1 and  
118 H2 retain binding to the growing GTP-tip, this result implies that foci formation cannot be solely  
119 explained by the presence of GTP-islands in the shaft and might also result from material  
120 properties of the multivalent +TIP-network.

### 121 122 *CLIP-170 forms biomolecular condensates in cells*

123 Analysis of +TIP-network fluorescence intensity revealed that with increasing GFP-CLIP-170  
124 expression levels, the CLIP-170 concentration plateaued in +TIP-networks, after an initial increase  
125 (Figures 2A and B). This indicates that CLIP-170 in +TIP-networks reaches a state of saturation  
126 and suggests a defined stoichiometry of CLIP-170 with the network. Interestingly, at the onset of  
127 this transition CLIP-170 patch formed in the cytoplasm (Figures 2A and B). Indeed,  
128 overexpression of CLIP-170 in CRISPR/Cas9 knock-in GFP-tubulin RPE-1 cells resulted in  
129 cytosolic CLIP-170 patches which displayed liquid properties, undergoing fusion and fission  
130 within 5 sec (Figure 2C and Movies 3, 4). Fluorescence recovery after photobleaching (FRAP)  
131 revealed that CLIP-170 diffuses highly within these patches and showed a high protein exchange  
132 rate with the pool outside the patch, with a recovery half-life and mobile fraction of 27.5 seconds  
133 and  $93 \pm 32 \%$ , respectively (Figure 2D and Movie 5). These properties lead us to conclude that  
134 CLIP-170 patches are biomolecular condensates in cells, hereafter called droplets.

### 135 136 *CLIP-170 forms biomolecular condensates in vitro*

137 To address whether CLIP-170 alone undergoes phase separation, we purified recombinant full-  
138 length human GFP-CLIP-170 (FL-CLIP) from insect cells (Figure S3A) and reconstituted its phase  
139 separation properties *in vitro*. In the absence of crowding agents and at physiological salt  
140 concentrations, FL-CLIP robustly condensed into spheres at concentrations as low as 3.1 nM  
141 (Figures 2E and S3B), which is below the cellular concentration of ~110 nM (Wisniewski et al.,  
142 2014). To estimate the amount of FL-CLIP in the dense phase, we used a high throughput confocal  
143 microscopy-based approach. Briefly, i) protein mixtures were incubated in 384-well plates, ii)  
144 proteins in the dense phase were centrifuged onto the bottom of the wells, iii) wells were imaged  
145 using an automated confocal microscope, and iv) surface coverage of protein in the dense phase  
146 on well-bottoms was measured (Figure S3C; see Methods for details). A hallmark property of  
147 LLPS-potent proteins is that they condense in a concentration-dependent manner and in response  
148 to the presence of crowding agents (Alberti et al., 2019). In line with this, the sphere size and  
149 amount of FL-CLIP in the dense phase increased in a concentration-dependent manner even in the  
150 absence of crowding agents (Figures 2F and S3D). Increasing the ionic strength of the buffer  
151 reduced the sphere size (Figure S3B). Addition of a crowding agent, 2 % polyethylene glycol  
152 (PEG), increased the amount of FL-CLIP in the dense phase by 1.5-fold but reduced sphere size  
153 (Figures S3E and F).

154  
155 In line with the case in cells, FL-CLIP spheres displayed liquid properties such as fusion, although  
156 5-times slower than what we observed in cells (Figure 2G and Movie 6). We further interrogated  
157 the liquid properties of these spheres by FRAP, which confirmed that FL-CLIP diffuses within the  
158 spheres with a half-life of 27.5 s, identical to the recovery speed in cells. However, FL-CLIP  
159 exchange dynamics were reduced three-fold with a mobile fraction of  $28 \pm 12\%$  (Figure 2H and  
160 Movie 7). By calibrating the fluorescent intensity of GFP, we estimated that the initial FL-CLIP  
161 concentration increased 8.5-fold within these spheres (Table 1). Collectively, these results show  
162 that FL-CLIP undergoes LLPS and forms droplets *in vitro* at nanomolar concentration and in the  
163 absence of further proteins or crowding agents. We hypothesize that the discrepancies between the  
164 material properties of the droplets in cells and *in vitro* are due to the presence of additional proteins  
165 and/or CLIP-170 post-translational modifications in the cell droplets.

### 166 167 *The CLIP-170 C-terminal region drives CLIP-170 into the dense phase*

168 We next investigated which domains of CLIP-170 drive droplet formation. We expressed GFP-  
169 tagged H2- and H1-CLIP mutants in RPE-1 cells where the C-terminal region is truncated or fully  
170 removed (Figure 1A) (Pierre et al., 1992, 1994; Diamantopoulos et al., 1999; Goodson et al., 2003).  
171 In line with previous observations, we saw that H1 and H2 displayed microtubule plus-end tracking  
172 activity in cells, but did not form any cytosolic droplets even at high expression levels (Figure 3A  
173 and Movies 8, 9) (Pierre et al., 1994; Goodson et al., 2003). To understand to which extent the C-  
174 terminal region is necessary for CLIP-170 to undergo LLPS, we purified recombinant human H1  
175 and H2 from bacteria and measured their ability to condense *in vitro* at nanomolar concentrations  
176 (Figure S4A). While FL-CLIP phase separated in the absence of other factors, H1 showed faint

177 irregular-shaped aggregation but no droplet formation, even in presence of 10 % PEG (Figures 3B,  
178 C and S4B, C). In contrast to the case in cells, at nanomolar concentration H2 underwent  
179 condensation *in vitro*, although with a 300-fold reduction of protein surface coverage and a 25-  
180 fold reduction in droplet size compared to FL-CLIP (Figures 3B, C, D and S4A). Addition of 2 %  
181 PEG increased H2 condensate formation by 3-fold but did not affect condensate size (Figures 3B,  
182 C and S4B, C).

183  
184 Intrinsically disordered domains are common features of proteins that undergo LLPS (Boeynaems  
185 et al., 2018). To parse out the contributions of disordered domains to FL-CLIP's phase separation  
186 potency, we engineered a mutant containing the H2 domain fused to the far C-terminal region,  
187 termed H2-tail (Figure S4E). This mutant lacks the majority of the coiled-coil region but retains  
188 many predicted disordered regions within CLIP-170 (Figure S4E). Attempts to purify this mutant  
189 resulted in insoluble large protein aggregates, highlighting the importance of the coiled-coil region  
190 for CLIP-170's solubility (Figure 3B). Collectively, these results show that while the monomeric  
191 H1 is sufficient to track the growing microtubule tip, the dimeric form of CLIP-170 is necessary  
192 to undergo LLPS and that the C-terminal region robustly drives CLIP-170 condensation.

### 193 194 *EB3 undergoes LLPS and co-condenses with CLIP-170*

195 CLIP-170 requires the presence of EBs to localize to growing microtubule ends (Dixit et al., 2009,  
196 Bieling et al., 2008). This prompted us to ask whether purified FL-CLIP and EB3 could co-  
197 condense *in vitro*. We first studied EB3 alone and observed that it has the capacity to undergo  
198 LLPS at micromolar concentrations: compared to  $48 \pm 17 \mu\text{m}^2$  large droplets observed for 400 nM  
199 FL-CLIP, at 1  $\mu\text{M}$  EB3 phase separated into many small  $1.9 \pm 0.6 \mu\text{m}^2$  droplets, resulting in a 3.5-  
200 fold reduced surface coverage (Figures 4A, B and S5A). EB3 fraction in the dense phase was  
201 comparable between 0 and 2 % PEG (Figures 4A and B). FRAP revealed that EB3 diffused within  
202 these patches at the same rate as FL-CLIP, but had a 2.5-fold higher protein exchange rate with  
203 the pool outside the droplet (Figure 4C and Movie 10).

204  
205 We next tested the ability of CLIP-170 to co-condense with EB3. Indeed, FL-CLIP and EB3  
206 robustly co-condensed into droplets, in which both proteins showed a homogenous distribution  
207 (Figure 4D and S5B). To address if diffusion kinetics are impacted by a multivalent EB3/FL-CLIP-  
208 network, we repeated our FRAP experiment. Surprisingly, the time to recover after photobleaching  
209 was the same for EB3, FL-CLIP and EB3/FL-CLIP droplets (Movies 7, 10, 11 and Figures 2H,  
210 4C and S5C). The mobile fraction of FL-CLIP and EB3/FL-CLIP was also comparable, however  
211 EB3 droplets had a 2- fold higher mobile fraction. This indicates that fluorescent recovery of FL-  
212 CLIP and EB3/FL-CLIP droplets depends more on protein diffusion, while protein exchange with  
213 the soluble pool further impacts recovery of EB3 droplets. In line with this observation, the three  
214 different droplets exhibited distinct surface interaction properties: EB3 did wet the coverslip  
215 resulting in flat droplets, while FL-CLIP and EB3/FL-CLIP droplets remained a similar sphere-  
216 like shape when bound to the coverslip (Movie 12, 13 and 14). Co-condensation of EB3 with FL-

217 CLIP increased the number of small droplets, such that droplets larger than  $40 \mu\text{m}^2$  were rarely  
218 observed (Figures S5D). This reduced the average droplet size by 20-fold compared to FL-CLIP,  
219 despite a 6-fold increase in total protein concentration in the solution ( $2 \mu\text{M}$  to  $12 \mu\text{M}$ ) (Figure  
220 S5E). These results show that EB3 and FL-CLIP can co-condensate and that the multivalency of  
221 the network does not further impact FL-CLIP diffusion within the network, while droplet size and  
222 surface tension can be impacted by the protein composition.

223

224 To study whether partitioning of +TIPs into pre-formed droplets affected condensation properties,  
225 we compared: i) co-condensation of EB3 and FL-CLIP, ii) addition of FL-CLIP to pre-formed  
226 EB3 droplets and iii) addition of EB3 to pre-formed FL-CLIP droplets. Addition of FL-CLIP to  
227 EB3 droplets increased the droplet size over time; however, upon reaching coarsy steady state, we  
228 observed no differences in droplet size or protein concentrations within the droplets between the  
229 three conditions (Figure 4D).

230

231 Interactions between EB1 and CLIP-170 are driven by the last C-terminal tyrosine of EB1 (Bieling  
232 et al., 2008). To probe whether specific protein-protein interactions underlie EB3/FL-CLIP co-  
233 condensation, we purified a EB3 tyrosine deletion mutant (EB3- $\Delta\text{Y}$ ) and repeated our  
234 colocalization assay. Removal of the last tyrosine drastically reduced EB3's ability to co-condense  
235 with FL-CLIP (Figure 4E), despite leaving EB3- $\Delta\text{Y}$ 's intrinsic phase separation properties intact  
236 (Figure S5F). Thus, specific binding interactions between EB3 and FL-CLIP are key features in  
237 their ability to co-condense. Altogether, these data show that EB3 undergoes phase separation and  
238 can co-condense with FL-CLIP into droplets with homogenous protein distribution. These droplets  
239 exhibit similar fluid properties, but likely different surface interaction properties.

240

#### 241 *EB3/CLIP-170-networks cooperatively phase separate*

242 Given that EB3/FL-CLIP droplets were reduced in size, we quantified whether the total amount of  
243 protein in the dense phase is reduced. Measuring the concentration of FL-CLIP in droplets  
244 compared to the dilute phase showed that FL-CLIP is enriched 24-fold in the droplet (Table 1).  
245 Co-condensation of FL-CLIP and EB3 only slightly increased the concentration of FL-CLIP in the  
246 droplet, while condensation of EB3 was increased 1.4-fold (Table 1). This implies, that FL-CLIP  
247 drives the partitioning of EB3 into droplets. To probe this observation further and to analyze the  
248 total amount of protein in the diluted and dense phase, we performed a droplet-pelleting assay  
249 followed by SDS-PAGE analysis (for details see Methods). Similar to what we observed by  
250 microscopy, in EB3/FL-CLIP networks the amount of condensed EB3 increased by 1.7-fold  
251 compared to amounts measured for EB3 alone (Figures 5A and B). We further studied the  
252 synergistic effect on droplet formation with our high-throughput microscopy assay. Although the  
253 size of EB3/FL-CLIP droplets decreased, the number of droplets increased leading to a surface  
254 coverage 2.5-fold higher than FL-CLIP droplets alone (Figure 5C, D and S5E). This resulted in a  
255 40 % increase of surface coverage by EB3/FL-CLIP networks when compared to the sum of the  
256 surface coverages of EB3 alone plus FL-CLIP alone ( Figure 5E).

257  
258 Repeating the EB3 experiment with H2 reduced surface coverage by 1.5-fold compared to the  
259 presence of FL-CLIP, and H1 further decreased surface coverage by 2.5-fold (Figures 5F and  
260 S5G). These data demonstrate that CLIP's C-terminal region is essential for a highly multivalent  
261 EB3/FL-CLIP network formation. We further show that EB3 and CLIP-170 can undergo LLPS  
262 both independently, and that when acting as an ensemble, the amount of proteins in the dense phase  
263 synergistically increases.

#### 264 265 *CLIP-170 and EB3 condense tubulin in vitro*

266 A CLIP-170 dimer has as many as 8 tubulin binding sites, can bind tubulin *in vitro*, and colocalizes  
267 with tubulin in cells (Figure 6A) (Pierre et al., 1994 et al., 1999; Perez et al., 1999; Gupta et al.,  
268 2010). We therefore asked if CLIP-170 droplets can co-condense tubulin *in vitro*. Tubulin alone  
269 did not form droplets at micromolar concentrations; even in the presence of 5% PEG only  
270 aggregation was observed (Figure S6A). However, when 200 nM FL-CLIP was mixed with 400  
271 nM Atto565-tubulin, the two proteins phase separated into  $26.8 \pm 12 \mu\text{m}^2$  droplets (Figures 6B and  
272 S6B). We repeated these experiments with H1 and found irregular-shaped aggregation with tubulin  
273 but no droplet formation (Figure 6B). Based on the intrinsic phase separating capacity of EB3, we  
274 studied whether EB3 alone could condense tubulin (Figure 4A). Indeed, EB3 also co-condensed  
275 tubulin, although into much smaller  $1 \pm 0.07 \mu\text{m}^2$  droplets, in line with our observed EB3 droplet  
276 size distribution (Figures 6C and S6C). EB3/FL-CLIP networks also condensed tubulin into  
277 intermediate-sized droplets, consistent with EB3 reducing the droplet size compared to FL-CLIP  
278 (Figure S6C). These results demonstrate that FL-CLIP, EB3 and EB3/FL-CLIP networks are  
279 potent to condense tubulin.

280  
281 Although all three different protein droplets condensed tubulin, the distribution of tubulin differed.  
282 Tubulin was homogeneously mixed within FL-CLIP droplets and in addition formed a shell-like  
283 structure around the droplets (Figure S6D). Within the shell, tubulin was concentrated twice as  
284 high as within the droplet (Table 1). This result indicates that within the droplet tubulin is mixed  
285 with FL-CLIP, while tubulin phase separates at the solution interface. In contrast to FL-CLIP  
286 droplets, tubulin was homogeneously distributed in EB3 and EB3/FL-CLIP droplets (Figure S6D).  
287 This implies that addition of EB3 changes the surface properties such that tubulin condensation at  
288 the interphase is not favorable.

289  
290 Strikingly, FL-CLIP droplets enriched condensed tubulin 40-fold more than EB3 droplets, even at  
291 5-fold lower FL-CLIP concentrations (Figure 6C). This difference in condensed tubulin cannot be  
292 solely explained by the 3.5-fold difference in surface coverage between EB3 and FL-CLIP, but  
293 indicates a difference in the potency of the two proteins to condense tubulin (Figure 6C). Based on  
294 this result, we asked whether addition of EB3 to FL-CLIP impacts tubulin condensation. Indeed,  
295 we observed that EB3/FL-CLIP networks condensed tubulin 4-fold less efficient than FL-CLIP  
296 alone (Figure 6C). We hypothesize that within a multivalent tubulin/EB3/FL-CLIP network the



297 heterotypic interaction between EB3 and FL-CLIP are stronger than EB3-tubulin and FL-CLIP-  
298 tubulin interactions, leading to a reduction of tubulin condensation, especially around the droplets.  
299 Collectively, these results show that FL-CLIP can condense tubulin effectively and that EB3  
300 reduces the tubulin condensation capacity of FL-CLIP droplets, while changing the surface  
301 properties of the droplets.

302

### 303 *Tubulin co-condenses with CLIP-170 in cells*

304 We next addressed whether CLIP-170 can condense tubulin in cells. Overexpressing GFP-CLIP-  
305 170 in RPE-1 cells revealed that CLIP-170 droplets colocalized with areas of high tubulin  
306 fluorescence intensity (Figure 6D, top panel) (Perez et al., 1999). However, it was not possible to  
307 distinguish if these areas corresponded to microtubule bundles, or if the local increased signal  
308 resulted from tubulin condensation. To address this question, we depolymerized the microtubule  
309 network with 5  $\mu$ M nocodazole. After microtubule depolymerization, tubulin showed robust co-  
310 localization with CLIP-170 droplets (Figure 6D, middle panel), and tubulin fluorescence intensity  
311 was 2.4-fold higher in the droplets compared to the cytoplasm (Figure 6E). To study whether  
312 CLIP-170 could also co-condense tubulin at endogenous concentration, we used antibody staining  
313 after microtubule network depolymerization. In WT cells, small foci of endogenous CLIP-170  
314 were frequently observed after microtubule network depolymerization, and these foci showed local  
315 enrichment of tubulin (Figure 6D, bottom panel). In cells depleted of CLIP-170 and in CLIP-170  
316 knockdown cells rescued with H2, we did not observe tubulin/FL-CLIP foci (Figure S6E).  
317 Contrary to our *in vitro* experiments, tubulin foci were not observed in nocodazole-treated cells  
318 overexpressing H2 or EB3 (Figure S6F). After depolymerization of the microtubule network EB3  
319 was cytoplasmic with a few small foci, but showed no distinct co-condensation with tubulin  
320 (Figure S6F). We conclude that CLIP-170, but not EB3, can condense tubulin in cells.

321

### 322 *Phase separation-potent +TIP networks increase microtubule growth*

323 The absence of either EB3 or CLIP-170 at the microtubule tip does not reduce growth speeds in  
324 cells (Komorova et al., 2002; Straube et al., 2007; Komorova et al., 2009). However, combined  
325 siRNA knockdown of EB3 and CLIP-170 reduced microtubule growth speeds by 20 % (Figures  
326 S7C and D). To understand if LLPS of +TIPs could impact microtubule tip dynamics, we turned  
327 to *in vitro* reconstitution. We first reconstituted microtubule growth in presence of +TIP-networks  
328 with either reduced (50 nM H2 + 800 nM EB3) or minimal (50 nM H1 + 800 nM EB3) LLPS  
329 activity (Figure 5F), implying reduced or minimal co-condensation of tubulin at the growing tip  
330 (Figure 6C). To our knowledge these CLIP mutants preserve all binding domains to interact with  
331 EB3 and tubulin, implying that the difference between these networks lies primarily in their phase  
332 separation potency. As observed previously, EB3 alone increased microtubule growth speeds by  
333 1.5-fold and catastrophe frequency by 8-fold (Figures 7A and B) (Komorova et al., 2009;  
334 Montenegro Gouveia et al., 2010). Addition of H1 or H2 to the assay with EB3 resulted in tip-  
335 tracking behavior by EB3/H1 and EB3/H2 networks, but did not further change any of the dynamic  
336 parameters compared to EB3 alone (Figures 7A, B and S8A). These results show that CLIP/EB3

337 networks with reduced or minimal capacity to condense tubulin have the same impact on  
338 microtubule tip dynamics as EB3 alone.

339

340 When we repeated the reconstitution experiments with EB3/FL-CLIP, microtubules grew at a  
341 speed of 3.5  $\mu\text{m}/\text{min}$ , a 1.5-fold increase compared to analogous experiments with EB3/H2 and  
342 EB3/H1, and nearly four-fold increase compared to controls with tubulin alone (Figures 7A, B and  
343 Movie 15). Furthermore, catastrophe events were reduced under these conditions (Figures 7A and  
344 B), and when they occurred were rapidly followed by rescue events (Figure S8A). To reconstitute  
345 this fast microtubule growth in presence of a phase separation deficient EB3/H2 network, we  
346 increased the tubulin concentration while keeping the EB3/H2 concentration constant. We  
347 measured microtubule growth speeds and found that a growth speed of 3.5  $\mu\text{m}/\text{min}$  (the speed  
348 achieved by EB3/FL-CLIP in the presence of 5  $\mu\text{M}$  tubulin) corresponds to 12.8  $\mu\text{M}$  tubulin in  
349 presence of EB3/H2 (Figures S8B and C). These results show that phase separation-potent  
350 EB3/FL-CLIP networks increase the growth rate and reduce the catastrophe events compared to  
351 EB3/H2 networks. A phase separated +TIP network might impact the growing microtubule tip due  
352 to changes in material properties, or due to condensation of tubulin at the tip, based on our  
353 observation that EB3/FL-CLIP can condense tubulin (Figure 6C).

354

355 *+TIPs undergo LLPS and condense tubulin on microtubules, promoting microtubule growth*

356 To understand if LLPS of EB3/FL-CLIP networks could enrich tubulin on microtubules, we used  
357 microtubules as a platform to induce LLPS. A recent study showed that addition of cell lysate  
358 containing overexpressed CLIP-170 to microtubules formed CLIP-170-containing droplets along  
359 microtubules (Jijumon et al., 2022). We asked if this droplet formation is due to the crowding  
360 environment of the cell lysate, or a general property of FL-CLIP. Under assay conditions with  
361 lower ionic strength (see materials and methods), we repeated our assay from above to study if  
362 purified EB3 together with FL-CLIP could phase separate along microtubules. When we incubated  
363 purified CLIP-170 and EB3 with dynamic microtubules in vitro, we found that purified EB3/FL-  
364 CLIP formed droplets along the shaft (Figure 7C and Movie 16).

365

366 In line with our observations that EB3/FL-CLIP droplets condensed tubulin (Figure S6D), these  
367 networks enriched tubulin all along the microtubule and co-condensed tubulin over time into  
368 droplets on the shaft, even more efficient than free floating droplets (Figures 7C-G). At this  
369 condition where tubulin condensed along the microtubule, we observed rapid microtubule growth  
370 speeds of 3.6  $\mu\text{m}/\text{min}$  and very few catastrophe events or pauses in the growth phase (Figures 7D,  
371 H and S8D). This increase in growth speed and reduction in catastrophe events is in line with our  
372 results from above where EB3/FL-CLIP was located at the microtubule tip. When we repeated  
373 these experiments with less potent phase separating EB3/H2-networks, we only occasionally  
374 observed condensate formation along the microtubule (Figure 7D, left panel). In presence of  
375 EB3/H2-networks growth speeds were 2-fold slower than for EB3/FL-CLIP, catastrophe  
376 frequencies were increased 7-fold and pauses increased 30-fold (Figure 7H and S8D). In the

377 absence of EB3, we did not observe microtubule binding or increased growth speeds for any CLIP  
378 constructs (Figures S8E and F). Collectively, these experiments demonstrate that EB3/FL-CLIP  
379 networks undergo LLPS on microtubules, can condense tubulin, and drive microtubule growth.

380

## 381 **Discussion**

382 Rearrangements of the microtubule network architecture require spatiotemporal regulation of  
383 microtubule growth. A large body of work has highlighted the role of +TIPs that act as microtubule  
384 polymerases (such as XMAP215) or increase microtubule tip dynamics (such as the EBs) in  
385 promoting these highly regulated changes (Gard and Kirschner, 1987; Srayko et al., 2005; Straube  
386 and Merdes, 2007; Brouhard et al., 2008; Bieling et al., 2008; Vitre et al., 2008; Zanic et al., 2013;  
387 Yang et al., 2017). While these studies showed the impact of +TIPs on microtubule dynamics, it  
388 has remained unclear how these proteins self-assemble to form highly dynamic and multivalent  
389 networks. LLPS allows for network formation of proteins based on highly multivalent interactions.  
390 We now provide evidence that LLPS of +TIPs could be a mechanism to explain the formation of  
391 +TIP-networks at the growing microtubule tip. This mechanism could be a base to locally recruit  
392 and enrich diverse +TIPs.

393

394 LLPS of proteins is often driven through weak multivalent interactions and low complexity  
395 domains (Boeynaems et al., 2018). A growing body of evidence also implicates coiled-coil regions  
396 of proteins in driving their LLPS. Coiled-coil domains allow for rapid dimerization and self-  
397 oligomerization which might be sufficient for the assembly of certain condensates (Larson et al.,  
398 2017; Strom et al., 2017). Notably, coiled-coil containing proteins are highly enriched in phase-  
399 separated centrosomes and P-granules (Salisbury, 2003; Ford and Fioriti, 2020), and many of these  
400 proteins phase separate in a coiled-coil dependent manner (Mitria and Kriwacki, 2016; Woodruff  
401 et al., 2017; Jiang et al., 2021). Our experiments using CLIP-170 truncation mutants emphasize  
402 the role that coiled-coil proteins can play in driving LLPS. In addition, our data implies that  
403 specific binding domains between EB3 and FL-CLIP are needed to form a multivalent network,  
404 as deletion of one single tyrosine strongly reduces EB3 co-condensation with FL-CLIP.

405

406 Here, we propose a new mechanism by which LLPS of +TIPs regulate microtubule growth. Our  
407 model of LLPS-driven microtubule growth is based on the following observations: i) the +TIPs  
408 EB3 and CLIP-170 have the capacity to undergo LLPS *in vitro* and in cells (Figures 2-5), ii) phase  
409 separated EB3/FL-CLIP droplets can condense tubulin (Figure 6), iii) microtubule growth speed  
410 is increased and catastrophe frequency reduced when EB3/FL-CLIP undergo phase separation on  
411 microtubules (Figure 7H), and iv) tubulin condensed along the microtubule in presence of phase  
412 separated EB3/FL-CLIP (Figure 7C-G). We hypothesize that this tubulin enrichment may be a  
413 mechanism to increase local tubulin availability at microtubule ends uncoupled from cytoplasmic  
414 tubulin concentrations. Microtubule dynamics might be further modulated by the viscosity of the  
415 droplets, such as sterically constraining protofilaments in a manner that accelerates growth or  
416 prevents catastrophes.

417  
418 Microtubules could serve as a general platform to concentrate proteins locally to a LLPS-sufficient  
419 concentration. We hypothesize that the mechanism of LLPS initiation at the growing tip depends  
420 on conformational properties of the growing microtubule tip, which leads to differential binding  
421 of EB3 to the tip over the shaft (Zhang et al., 2015) and subsequent recruitment of CLIP-170 to  
422 form a multivalent network. As LLPS is a concentration dependent process, the local recruitment  
423 of EB3 and CLIP-170 could increase their concentration compared to the solution to such an extent  
424 that they undergo LLPS. We hypothesize that, upon reaching a critical CLIP-170 concentration,  
425 the +TIP-network undergoes LLPS. This +TIP-droplet has then the potential to, e.g. co-condense  
426 tubulin, and drive microtubule growth. Once the GTP-cap is hydrolyzed, the +TIP-droplet  
427 dissolves. This implies that the shape of the +TIP-droplets would follow the decaying GTP-tubulin  
428 profile at the growing microtubule tip. Whether the stoichiometry between EB3 and CLIP-170 has  
429 an impact on the LLPS process, as well as the distinct fluid properties and dynamics of an  
430 EB3/CLIP-170 droplet, merit investigation in future work.

431  
432 A EB3/FL-CLIP droplet has distinct surface properties that differ from EB3- or FL-CLIP droplets  
433 in: surface tension, mobile fraction and tubulin interaction. These characteristics might be  
434 important for microtubule - EB3/FL-CLIP droplet interaction. Interestingly, we observed that  
435 EB3/FL-CLIP droplets on microtubules strongly enriched tubulin, while tubulin was less  
436 condensed in free floating EB3/FL-CLIP droplets. This might indicate that the microtubule surface  
437 can change the propensity of the EB3/FL-CLIP droplets to condense tubulin.

438  
439 We hypothesize that LLPS of +TIPs serves an organizational purpose, allowing for the formation  
440 of a highly concentrated protein network at microtubule ends. Based on our observation that +TIPs  
441 concentrate soluble tubulin into droplets and on microtubules, we postulate that this process may  
442 contribute to regulation of microtubule dynamics in cells. Interestingly, depletion of CLIP-170 or  
443 EB3 from cells has been reported to only mildly affect microtubule dynamics in cells (Komorova  
444 et al., 2002), while depletion of EB3 and CLIP-170 reduced the growth speed by 20 % (Figure S7)  
445 Given that there is a level of redundancy in the functions of EBs in regulating microtubule  
446 dynamics in cells (Komorova et al., 2009; Yang et al., 2017), and the observation that diverse  
447 +TIPs partition into CLIP-170 condensates (Wu et al., 2021), we favor the hypothesis that +TIP-  
448 network condensation can be driven by multiple different proteins. In this scenario, individual  
449 depletions of CLIP-170 or EB3 would not strongly diminish microtubule growth, as other +TIPs  
450 could compensate for driving +TIP-network phase separation. Further studies comparing the  
451 phase-separation potencies of other +TIPs, as well as combinatorial depletions of LLPS-potent  
452 +TIPs in cells, will be of interest in addressing this question.

453  
454 Is phase separation a common feature of +TIPs? Studies performed in parallel to our work show  
455 that this phenomenon is conserved across evolution: +TIPs in budding yeast, fission yeast, and  
456 higher eukaryotes have recently been demonstrated to undergo phase separation (Maan et al., 2021;

457 Meier et al., 2021; Song et al., 2021, Jijumon et al., 2022). Intriguingly, in line with our results,  
458 the yeast studies confirmed that the CLIP-170 homolog played a key role in the phase separation  
459 process, whereas LLPS potency of EB homologs varied between organisms. The role of different  
460 mammalian EB family members in regulating LLPS will be an interesting direction for future  
461 studies. The ability of +TIP-networks to phase separate depends on intrinsically disordered regions  
462 (Maan et al., 2021; Song et al., 2021) and multivalent interaction modules (Meier et al., 2021),  
463 consistent with the observation that these features are highly evolutionarily conserved across  
464 +TIPs (Wu et al., 2021). Further studies will be necessary to investigate whether additional +TIPs  
465 contribute to the formation and regulation of +TIP-droplets.

466  
467 Our work here and recent studies demonstrate that +TIP networks can behave like liquid  
468 condensates (Wu et al., 2021; Maan et al., 2021; Meier et al., 2021; Jijumon et al., 2022; Song et  
469 al., 2021). This work adds to the growing list of microtubule-related processes that are driven by  
470 LLPS and provides an exciting new paradigm for how cells can spatiotemporally control  
471 microtubule dynamics through local tubulin concentration (Jiang et al., 2015; Woodruff et al.,  
472 2017; Hernández-Vega et al., 2017; King and Petry, 2020; Jiang et al., 2021; Maan et al., 2021;  
473 Meier et al., 2021; Song et al., 2021). Interrogating the mechanical properties and composition of  
474 +TIP-droplets, as well as studying their regulation throughout the cell cycle, will be exciting  
475 avenues for future research.

#### 476 477 **Acknowledgements**

478 We thank Thomas Surrey (Centre for Genomic Regulation, Barcelona, Spain) for providing the  
479 FL-CLIP-170 expression vector for insect cells, and Michel Steinmetz (Paul Scherrer Institute,  
480 Villigen PSI, Switzerland) for providing vectors for EB3 purification. We would also like to thank  
481 Peter Bieling (Max Planck Institute of Molecular Physiology, Dortmund, Germany) for helpful  
482 discussions regarding expression and purification of FL-CLIP-170, and Maria Hondele  
483 (University of Basel, Switzerland) for helpful discussions for phase separation experiments. We  
484 would like to thank Dimitri Moreau and Stefania Vossio from the ACCESS Geneva high-content  
485 microscopy facility for help with microscopy and data analysis. We also thank Oscar Vadas and  
486 Rémy Visentin of the Protein Platform (Faculty of Medicine, University of Geneva, Switzerland)  
487 for support in FL-CLIP-170 expression. We would also like to thank Karsten Kruse and Marcos  
488 Gaitan-Gonzales and for critically reading the manuscript.

489  
490 JM has been supported by the SNSF, 31003A\_182473; RTW has been supported by the NCCR  
491 Chemical Biology program; CA has been supported by the DIP of the Canton of Geneva, SNSF  
492 (31003A\_182473), and the NCCR Chemical Biology program.

493  
494 **Author Contributions:** JM and RTW performed and designed the experiments with the help of  
495 CA. MCV purified the proteins. JM, RTW, and CA analyzed data. RTW and CA wrote the  
496 manuscript.

497 **Declaration of Interests:** The authors declare no competing interests.

498

499

500

501

502

503

504

505 **Figures 1-6**

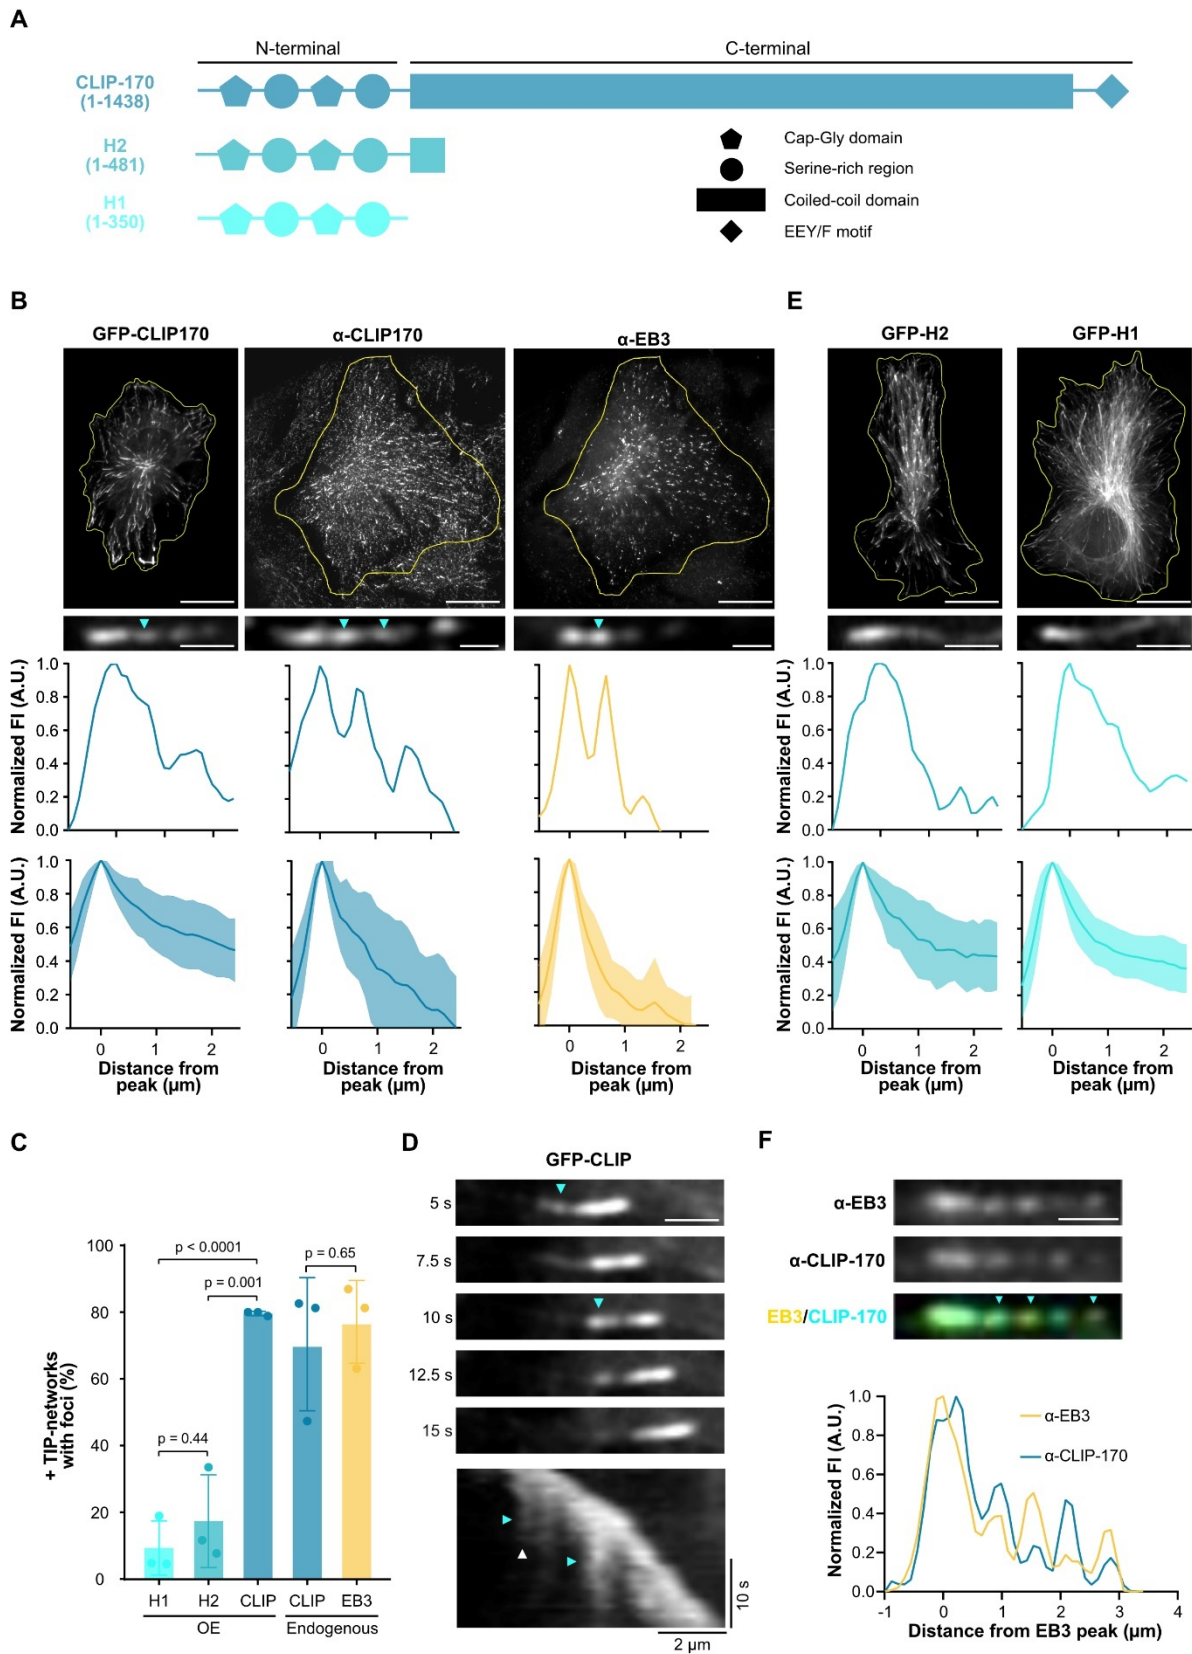

507 **Figure 1: In cells the EB3/CLIP-170 +TIP-network displays liquid properties at microtubule**  
508 **tips.**

509 (A) Secondary structure of CLIP-170 (1-1438), H2 (1-481) and H1 (1-350) based on (Pierre et al.,  
510 1994; Diamantopolous et al., 1999; Goodson et al., 2003). (B) Representative images (top) of fixed  
511 RPE-1 cells transfected with full length GFP-CLIP-170 or WT RPE-1 cells stained with antibodies  
512 to endogenous CLIP-170 and EB3. Representative profiles of +TIP-networks with matching  
513 fluorescence line scans (bottom). Cyan arrowheads indicate tailing foci. Scale bars: 20  $\mu\text{m}$  whole-  
514 cell, 2  $\mu\text{m}$  insets. Below are quantified mean line scan profiles (dark line) with standard deviation  
515 (shaded area) from 3 independent experiments with a total of: GFP-CLIP-170 57 +TIP-networks  
516 from 22 cells; anti-CLIP-170 and anti-EB3 58 +TIP-networks from 12 cells for each condition.  
517 (C) Percentage of +TIP-networks with foci in fixed cells expressing the indicated CLIP constructs  
518 or stained with antibodies to endogenous CLIP-170 or EB3 analysis from B and E. Mean with SD  
519 from 3 independent experiments. Statistics: one-way ANOVA test. (D) Representative time-lapse  
520 images (top) and kymograph (below) of +TIP-network from GFP-CLIP-170 expressing RPE-1  
521 cell. Cyan and white arrowheads denote foci formation and dissolving respectively in both time-  
522 lapse images and kymograph. Scale bar: 2  $\mu\text{m}$ . (E) Representative images of fixed RPE-1 cells  
523 transfected with GFP-H2 and GFP-H1. Representative profiles of +TIP-networks with matching  
524 fluorescence line scans (bottom). Scale bars: 20  $\mu\text{m}$  whole-cell, 2  $\mu\text{m}$  insets. Below are quantified  
525 mean line scan profiles (dark line) with standard deviation (shaded area) from 3 independent  
526 experiments with a total of: H2 33 +TIP-networks from 18 cells; H1 47 +TIP-networks from 33  
527 cells. (F) Representative +TIP-network from cells stained for endogenous EB3 and CLIP-170  
528 showing partial co-localization of EB3 and CLIP-170 foci (cyan arrowheads) with corresponding  
529 fluorescence line scan below. Scale bar: 1  $\mu\text{m}$ .



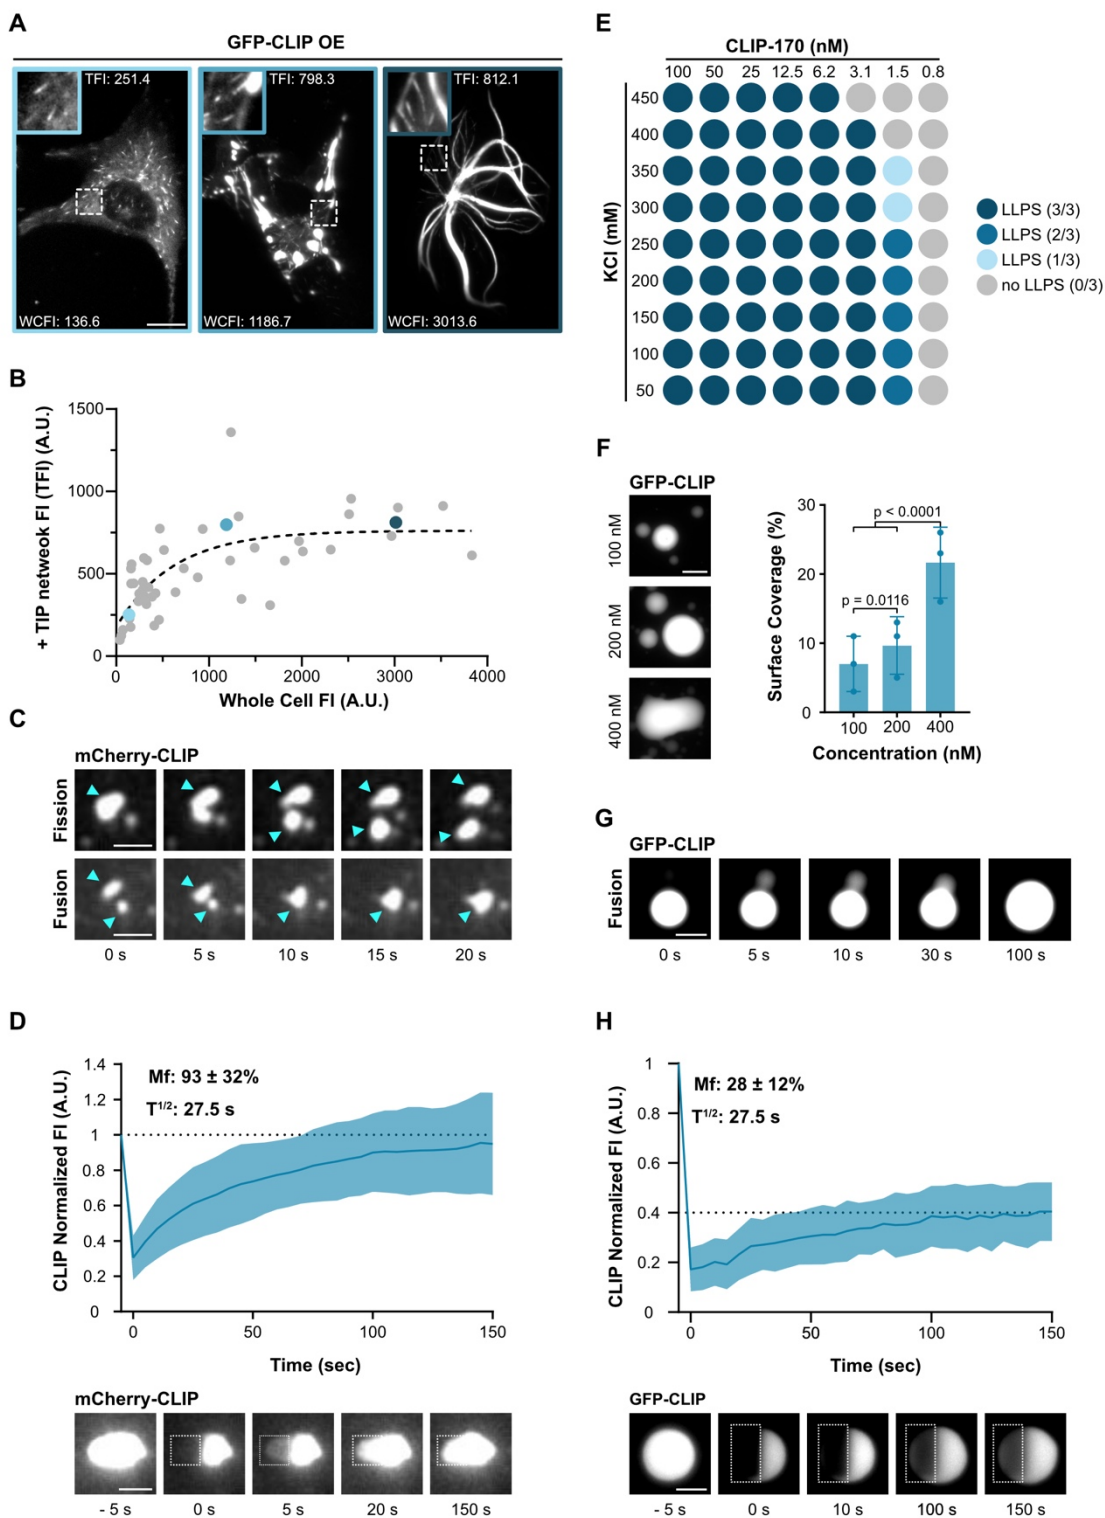

531 **Figure 2: CLIP-170 condenses into droplets in cells and *in vitro*.**

532 (A) Representative TIRF images of a RPE-1 cells transfected with GFP-CLIP-170, at three  
533 different overexpression levels (see also Figure S2A). Zoom-in shows +TIP-networks with  
534 adjusted contrast for visualization. For each cell, the whole cell fluorescence intensity (WCFI) and  
535 peak of +TIP network fluorescence intensity (TFI) is indicated, blue outlining of the image  
536 corresponds to colored data points in (B). Scale bar: 10  $\mu\text{m}$ . (B) Analysis of A showing the  
537 correlation between peak +TIP network fluorescence intensity and whole cell fluorescence  
538 intensity in RPE-1 cells expressing GFP-CLIP-170. Dashed line shows exponential curve fit. Each  
539 dot represents 5 analyzed +TIP-networks from one cell, data from 2 independent experiments with  
540 a total of 42 cells. (C) Representative TIRF time-lapse images of mCherry-CLIP-170 droplets  
541 undergoing fission (top panel, cyan arrowheads), and fusion (bottom panel, cyan arrowheads) in  
542 cells. Scale bar: 2  $\mu\text{m}$ . (D) Representative TIRF images and recovery curve of mCherry-CLIP-170  
543 patches after photobleaching (dashed box). Curve shows mean with SD of 5 individual  
544 experiments with a total of 38 droplets from 23 cells. Scale bar: 2  $\mu\text{m}$ . Note that mCherry-CLIP-  
545 170 and GFP-CLIP-170 showed the same FRAP-recovery and patch formation behavior (Figures  
546 S2A-C) (E) Phase diagram of GFP-FL-CLIP *in vitro* at increasing KCl and protein concentration.  
547 Blue shaded dot denotes where phase separation occurred, results of 3 independent experiments.  
548 (F) Representative confocal images of purified GFP-FL-CLIP at indicated concentrations and  
549 quantification of the coverslip surface coverage. Statistics: two-tailed Student's *t*-test. Mean with  
550 SD from 3 independent experiments with a total of 27 fields of view per condition. Scale bar: 20  
551  $\mu\text{m}$ . (G) Time-lapse images of purified GFP-FL-CLIP (1  $\mu\text{M}$ ) undergoing fusion. Representative  
552 of 3 experimental replicates. Scale bar: 10  $\mu\text{m}$ . (H) Representative images and recovery curve of  
553 purified GFP-FL-CLIP (2  $\mu\text{M}$ ) droplets after photobleaching (dashed box). Curve shows mean  
554 with SD of 3 individual experiments with a total of 47 condensates. Scale bar: 5  $\mu\text{m}$ .

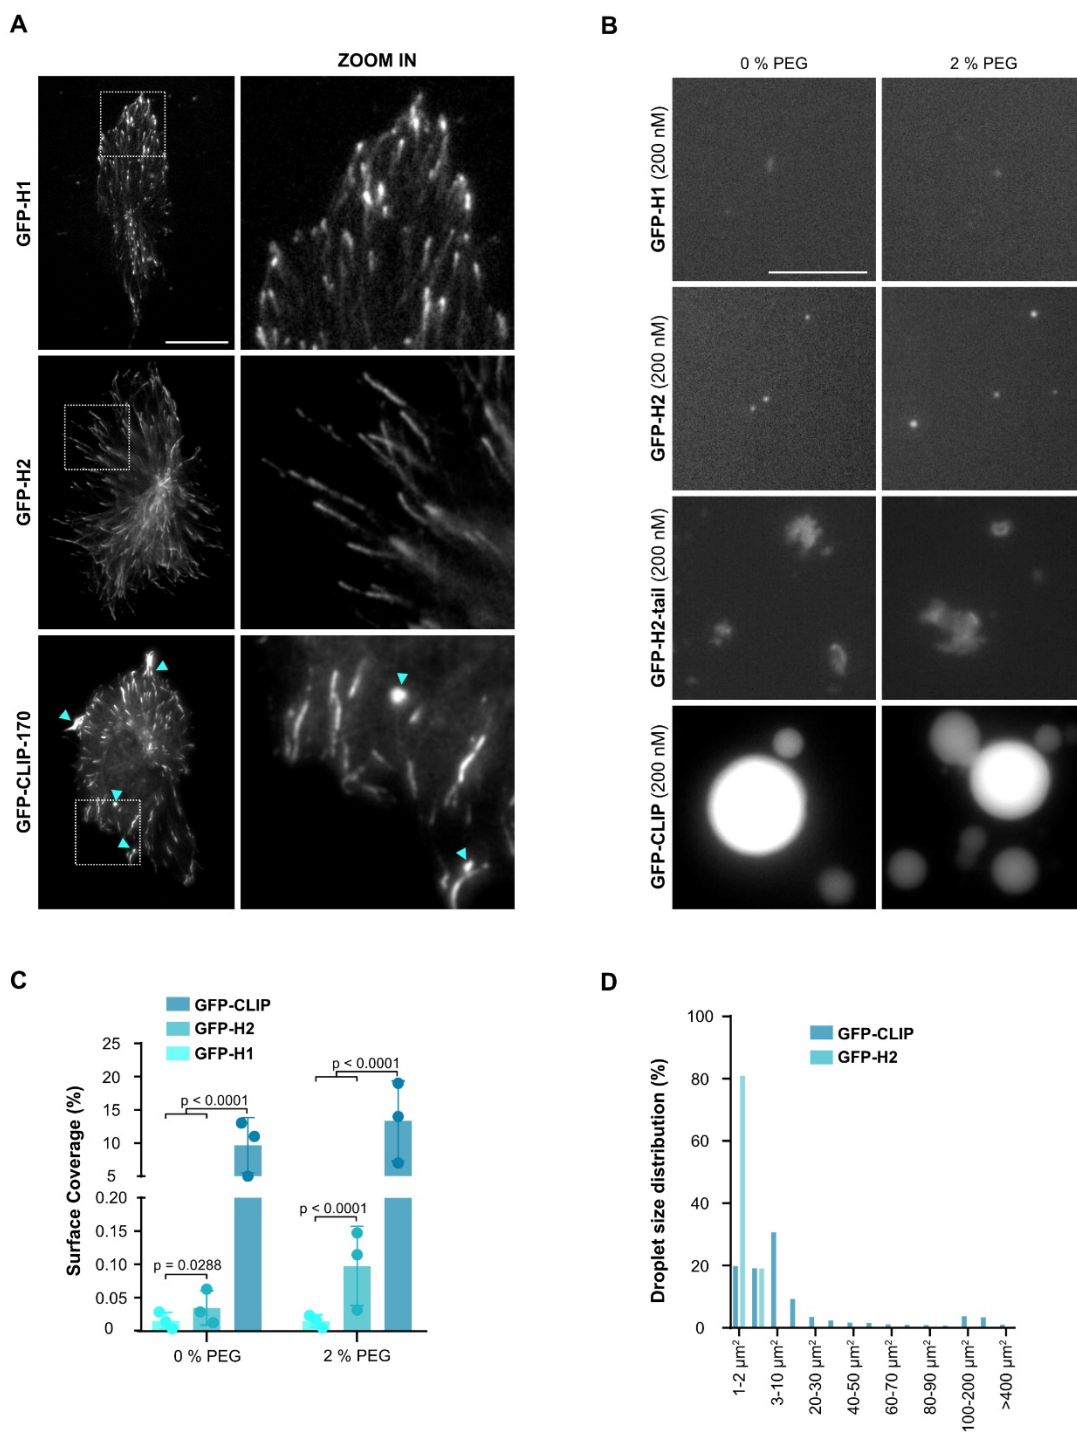

556  
557  
558  
559  
560  
561  
562  
563  
564  
565  
566  
567

**Figure 3: The C-terminal region drives CLIP-170 into the dense phase.**

(A) Representative images of fixed RPE-1 cells transfected with full length GFP-CLIP-170, GFP-H2 or GFP-H1 (left panel) with insets (right panel). Cyan arrowheads denote droplet formation in GFP-CLIP-170 expressing cell. Scale bar: 20  $\mu$ m. (B) Representative confocal images of purified GFP-H1, GFP-H2, GFP-H2-tail and GFP-CLIP-170 each at 200 nM in the absence (left panel) or presence (right panel) of 2 % PEG. Scale bar: 20  $\mu$ m. (C) Condensate surface coverage of the three constructs at indicated PEG concentrations. Mean with SD from 3 independent experiments with a total of 27 fields of view per condition. Statistics: two-tailed Student's *t*-test. (D) Size distribution of GFP-FL-CLIP (200 nM) and GFP-H2 (200 nM) droplets in the absence of PEG. Graph shows average size distribution from 3 independent experiments with a total of 27 fields of view.

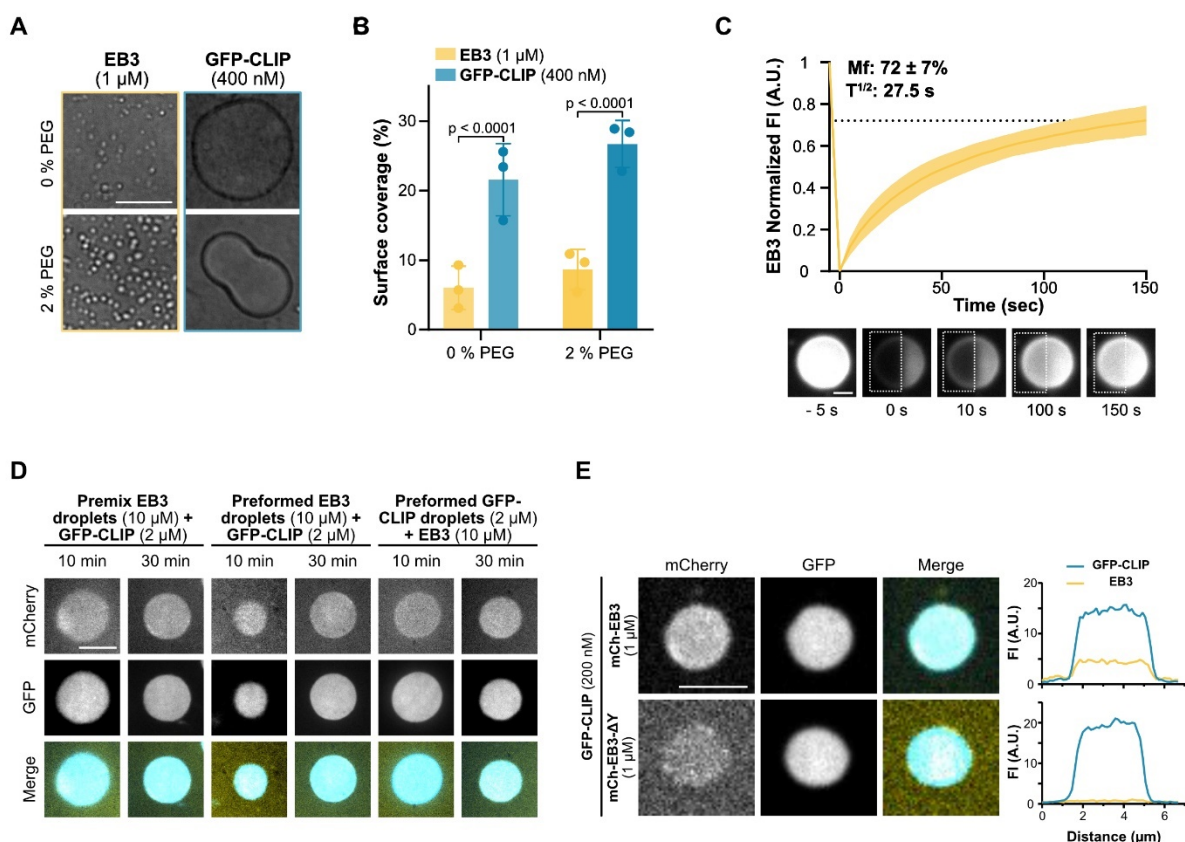

568  
569  
570  
571  
572  
573  
574  
575  
576  
577  
578

**Figure 4: EB3 undergoes LLPS and co-condenses with CLIP-170 *in vitro*.**

(A) Representative DIC images of purified EB3 (1  $\mu$ M) and GFP-FL-CLIP (400 nM) in absence (top panel) or presence (bottom panel) of 2 % PEG. Scale bar: 20  $\mu$ m. (B) Condensate surface coverage of EB3 (1  $\mu$ M) and GFP-FL-CLIP (400 nM) at indicated PEG concentrations. Mean with SD from 3 independent experiments with a total of 27 fields of view. Statistics: two-tailed Student's *t*-test. (C) Representative images and recovery curve of purified EB3 (10  $\mu$ M) + mCherry-EB3 (100 nM) droplets after photobleaching (dashed box). Curve shows mean with SD of 3 independent experiments with a total of 32 condensates. Scale bar: 5  $\mu$ m. (D) Representative images of 2  $\mu$ M GFP-FL-CLIP and 10  $\mu$ M EB3 (8  $\mu$ M unlabeled + 2  $\mu$ M mCherry-EB3 ) in the denoted mixing conditions; 10 min after mixing and at coarsy steady state - 30 min after mixing.

579 Scale bar: 10  $\mu\text{m}$ . (E) Representative images of EB3/GFP-FL-CLIP droplets (top) or EB3-  
580  $\Delta\text{Y}$ /GFP-FL-CLIP droplets (bottom) at denoted concentrations with the corresponding line scan.  
581 Scale bar: 4  $\mu\text{m}$ .  
582  
583

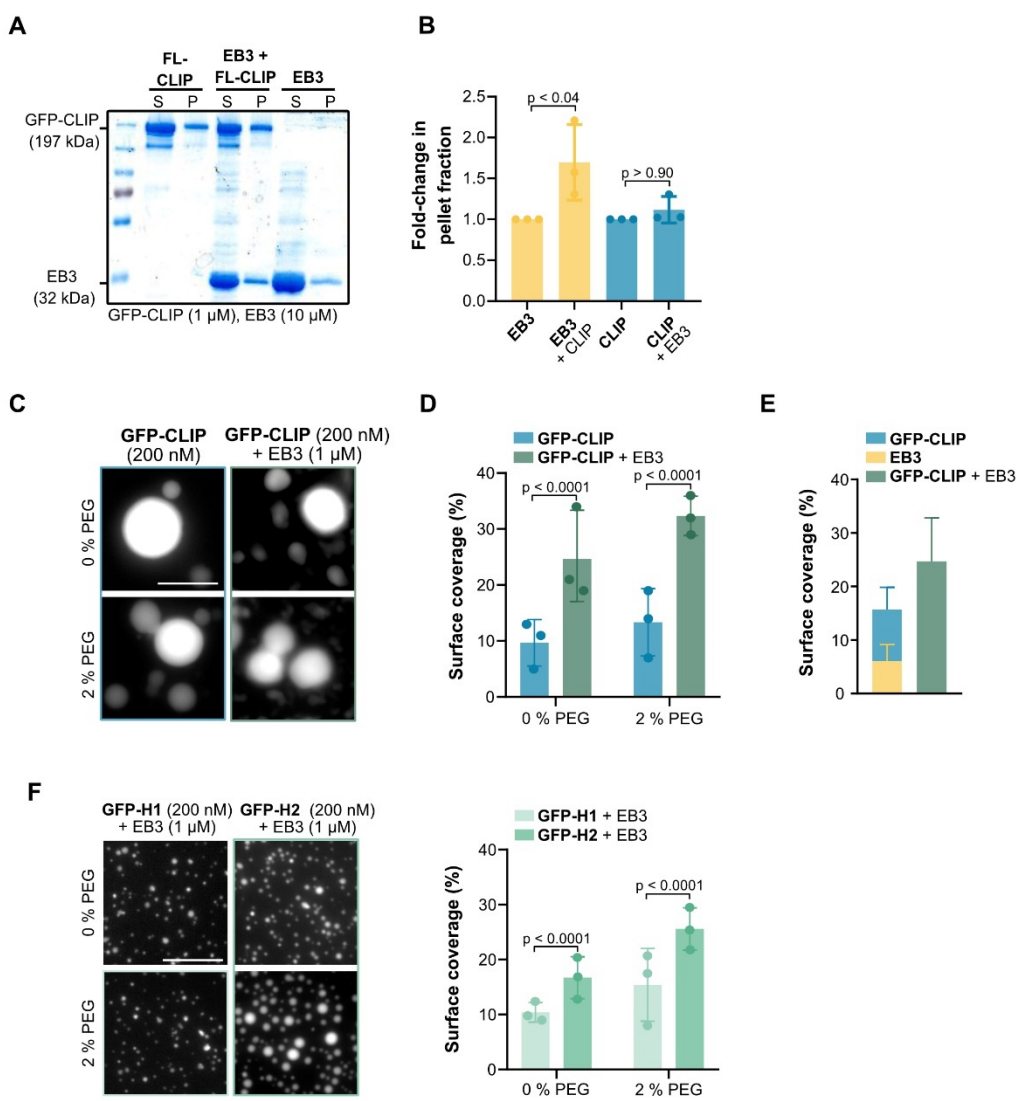

585 **Figure 5: Synergistic condensation of CLIP-170 and EB3.**

586 (A) Representative SDS-PAGE analysis from the droplet-pelleting assay showing protein fractions  
587 in supernatant dilute phase (S) or pellet dense phase (P) under each condition: 1  $\mu$ M GFP-FL-  
588 CLIP; 10  $\mu$ M EB3; EB3/GFP-FL-CLIP (10  $\mu$ M + 1  $\mu$ M). (B) Quantification of SDS-PAGE  
589 analysis showing the fold-change of protein in the pellet fraction at the three conditions. Mean  
590 with SD from three independent experiments. Statistics: one-way ANOVA. (C) Representative  
591 fluorescence confocal images of purified GFP-FL-CLIP in the absence (left) or presence (right) of  
592 EB3, and in the absence (top panel) or presence (bottom panel) of 2 % PEG. Scale bar: 20  $\mu$ m. (D)  
593 Condensate surface coverage of purified GFP-FL-CLIP in the absence (left) or presence (right) of  
594 EB3 at indicated PEG concentrations. Mean with SD from 3 independent experiments with a total  
595 of 27 fields of view. Statistics: two-tailed Student's *t*-test. (E) Quantification of droplet surface  
596 coverage of EB3 and GFP-FL-CLIP alone compared to surface coverage of EB3/GFP-FL-CLIP  
597 droplet formation when undergoing synergistic LLPS in the absence of PEG. (F) Representative  
598 fluorescence confocal images and quantification of purified GFP-H1 (left) or GFP-H2 (right) in  
599 the presence of EB3, and in the absence (top panel) or presence (bottom panel) of 2 % PEG. Scale  
600 bar: 20  $\mu$ m. Right: condensate surface coverage of indicated GFP-H1 (200 nM) or GFP-H2 (200  
601 nM) in the presence of EB3 (1  $\mu$ M), and in the presence of the indicated PEG concentrations. Mean  
602 with SD from 3 independent experiments with a total of 27 fields of view. Statistics: two-tailed  
603 Student's *t*-test.

604  
605  
606  
607

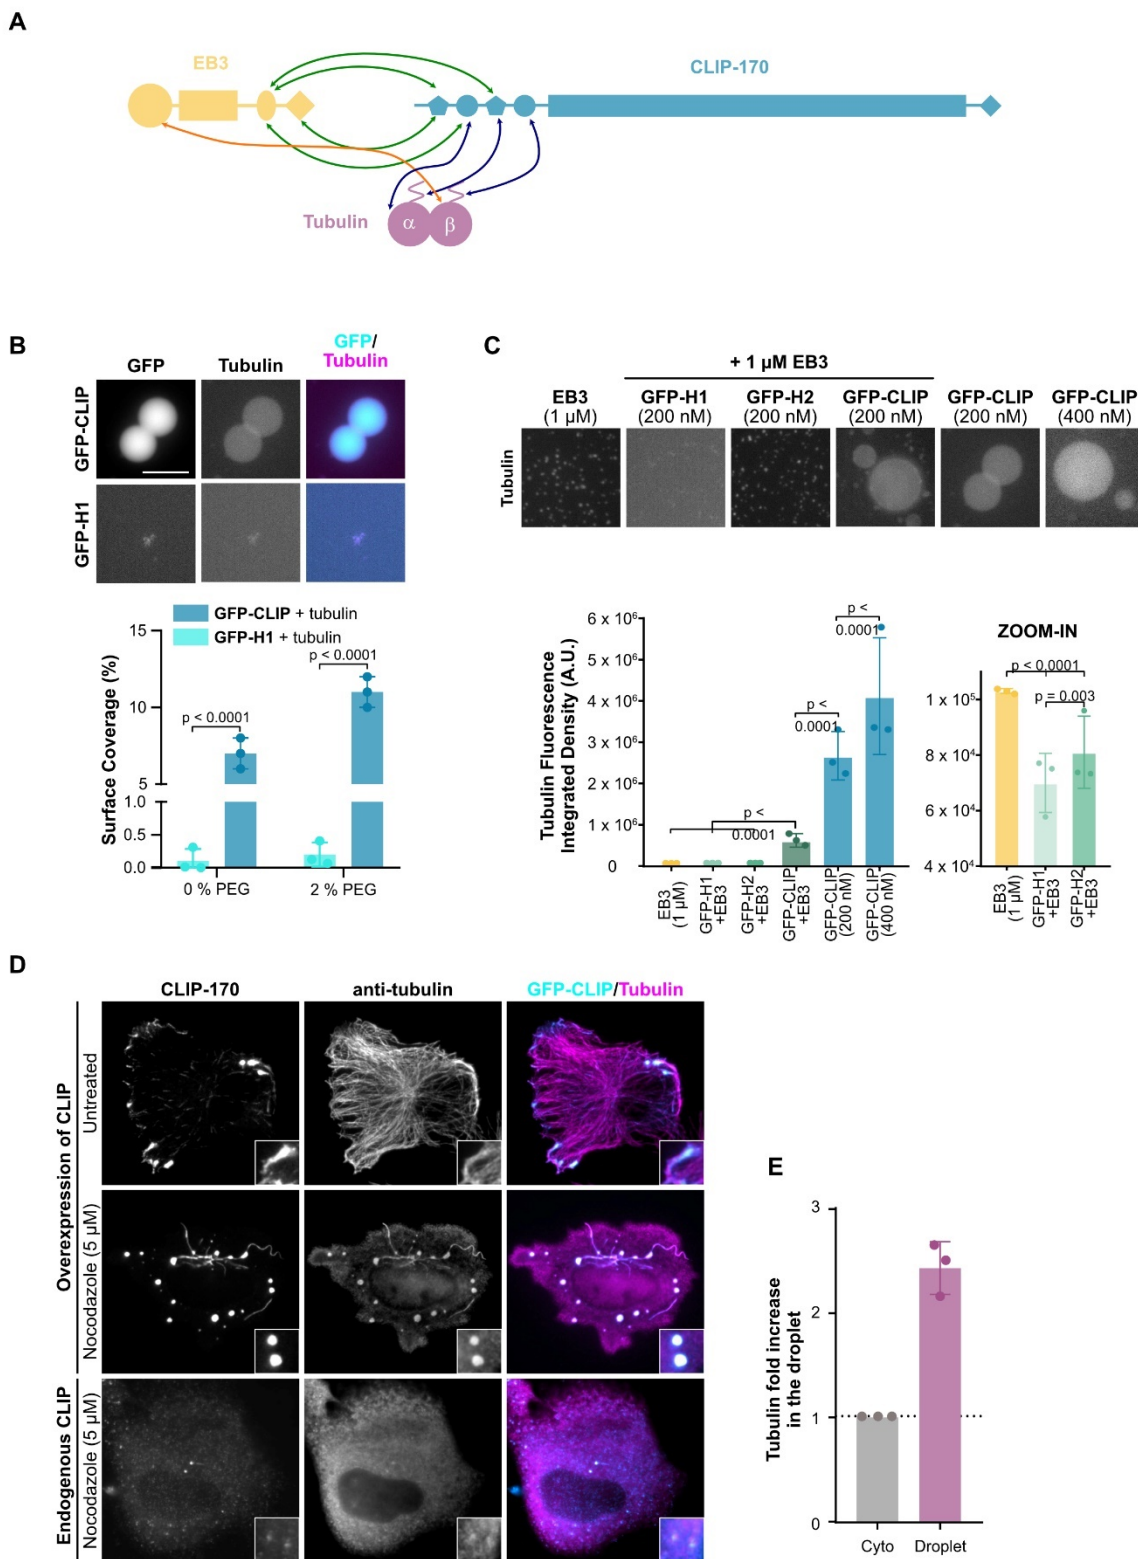



609 **Figure 6: CLIP-170 and EB3 droplets condense tubulin.**

610 (A) Cartoon schematic of domain interactions between EB3, CLIP-170, and tubulin based  
611 primarily on (Gupta et al., 2010; Chen et al., 2021; Bjelic et al., 2012). Interaction sites between  
612 EB3 and CLIP-170, EB3 and tubulin, and CLIP-170 and tubulin are shown with green, orange,  
613 and blue arrows, respectively. For simplification, monomers of EB3 and CLIP-170 are shown. (B)  
614 Top: representative confocal images of purified GFP-FL-CLIP and GFP-H1 each at 200 nM with  
615 Atto-565-tubulin (400 nM). Scale bar: 20  $\mu\text{m}$ . Bottom: quantification of the coverslip surface  
616 coverage of tubulin in presence of GFP-FL-CLIP or GFP-H1. Mean with SD from 3 independent  
617 experiments with a total of 27 fields of view. Statistics: two-tailed Student's *t*-test. Note that co-  
618 condensation is independent of the fluorescent tag, as unlabeled tubulin also partitioned into GFP-  
619 FL-CLIP droplets see Figure S6B. (C) Top: representative confocal images of Atto-565-tubulin  
620 (400 nM) in the presence of purified EB3 (1  $\mu\text{M}$ ), GFP-H1 (200 nM) and EB3 (1  $\mu\text{M}$ ), GFP-H2  
621 (200 nM) and EB3 (1  $\mu\text{M}$ ), GFP-FL-CLIP (200 nM) and EB3 (1  $\mu\text{M}$ ), and GFP-FL-CLIP (200  
622 nM and 400 nM) alone. Scale bar: 20  $\mu\text{m}$ . Bottom: quantification of the integrated density of  
623 tubulin fluorescence under denoted conditions with zoom in for the first three conditions. Mean  
624 with SD from 3 independent experiments with a total of 27 fields of view. Statistics: two-tailed  
625 Student's *t*-test. (B-C) Note that droplet centrifugation onto the coverslip lead to a homogenous  
626 distribution of tubulin in the GFP-FL-CLIP droplet, see Figure S6B (D) Representative images of  
627 fixed RPE-1 cells transfected with GFP-CLIP-170 and untreated (top panel) or treated with 5  $\mu\text{M}$   
628 nocodazole for 1 hour (middle panel); RPE-1 WT cells were treated with 5  $\mu\text{M}$  nocodazole (bottom  
629 panel) and stained for endogenous CLIP-170 and tubulin. Scale bar: 10  $\mu\text{m}$ . Images are  
630 representative of 3 independent experiments. (E) Graph showing normalized tubulin fluorescence  
631 intensity in CLIP-170 droplets compared to cytoplasm in full-length GFP-CLIP-170 transfected  
632 RPE-1 cells treated with nocodazole. Mean with SD from 3 independent experiments with a total  
633 of 126 condensates from 26 cells.

634  
635

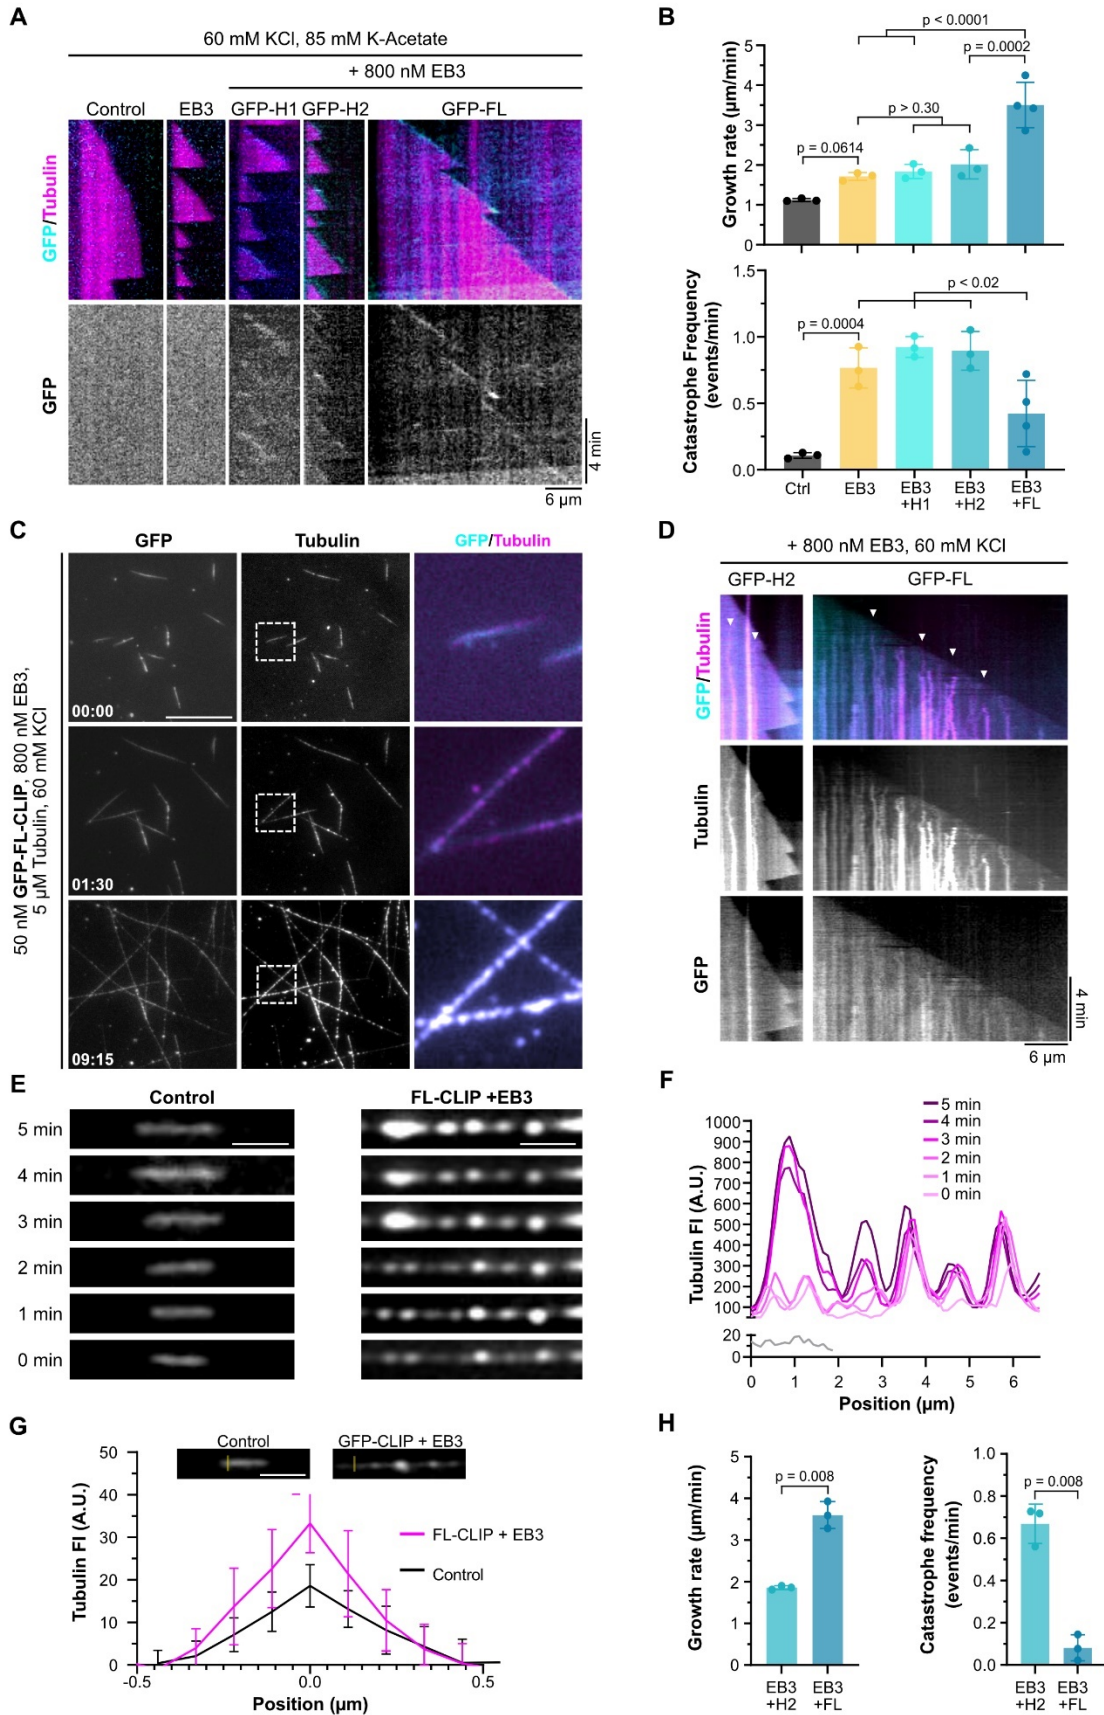

637 **Figure 7: LLPS of +TIPs regulates microtubule dynamics through local tubulin**  
 638 **condensation.**

639 (A) Representative microtubule kymographs of denoted +TIP-networks in higher salt buffer (60  
 640 mM KCl and 85 mM K-acetate, see materials and methods). Note that tip-tracking efficiency (GFP  
 641 channel) is weaker at 5  $\mu$ M tubulin than at higher tubulin concentrations (Figure S8B). (B)  
 642 Microtubule growth rate (top) and catastrophe frequency (bottom) in presence of denoted proteins  
 643 in high salt buffer. Mean with SD of minimum of three independent experiments with the following  
 644 number of analyzed microtubules: Control – 48; EB3 – 31; EB3/H1 – 28; EB3/H2 – 28; EB3/FL-  
 645 CLIP - 60. Statistics: One-way ANOVA Fisher’s LSD test. (C) Representative time-lapse TIRF  
 646 images of GFP-FL-CLIP (50 nM) with Atto-565-tubulin (5  $\mu$ M) in the presence of unlabeled EB3  
 647 (800 nM) and 60 mM KCl. Time denoted in minutes: seconds; scale bar: 20  $\mu$ m. The zoom-ins  
 648 (white dashed box) show representative droplet formation along microtubules. (D) Representative  
 649 microtubule kymographs in the presence of GFP-H2 or GFP-FL-CLIP (50 nM) and EB3 (800 nM)  
 650 grown at 5  $\mu$ M tubulin and 60 mM KCl. Arrowheads denote areas of robust tubulin/FL-CLIP  
 651 condensation on growing microtubule shaft. (E) Representative images of Atto-565-tubulin  
 652 microtubules growing in the absence (left, control) and in presence of EB3/FL-CLIP (right). Right  
 653 images show tubulin condensation along microtubule over time. Scale bar: 2  $\mu$ m. (F)  
 654 Corresponding line scan of E with the gray line scan representing the 5  $\mu$ M tubulin control  
 655 condition and the magenta line scans of 5  $\mu$ M tubulin in presence of EB3/FL-CLIP (800 nM/50  
 656 nM). (G) Tubulin fluorescence intensity in tip-proximal regions in 5  $\mu$ M tubulin control condition  
 657 and in presence of EB3/FL-CLIP. Quantification of perpendicular line scans in tip-proximal  
 658 regions. Mean with SD from 2 independent experiments for each condition and a total of 20  
 659 microtubules; Scale bar: 2  $\mu$ m. (H) Quantification of microtubule growth rate (left) and catastrophe  
 660 frequency (right) in the presence of EB3/H2-networks and EB3/FL-CLIP droplets in experiments  
 661 from D (60 mM KCl). Mean with SD of three independent experiments with the following number  
 662 of analyzed microtubules: EB3/H2 – 29; EB3/FL-CLIP – 59. Statistics: paired t-test.

663  
 664

|                                                     | $C_{dilute}$ (nM) | $C_{droplet}$ (nM)        | Ratio ( $C_{droplet}/C_{dilute}$ ) |
|-----------------------------------------------------|-------------------|---------------------------|------------------------------------|
| <b>CLIP-170</b> ( 200 nM)                           | 70                | 1 700                     | 24                                 |
| <b>mcherry-EB3</b> (2 $\mu$ M) + EB3 (8 $\mu$ M)    | 8 600             | 31 000                    | 3.5                                |
| <b>CLIP-170</b> (200 nM) + mcherry-EB3 (1 $\mu$ M)  | 75                | 1 800                     | 24                                 |
| <b>mcherry-EB3</b> (1 $\mu$ M) + CLIP-170 ( 200 nM) | 400               | 2 000                     | 5                                  |
| <b>CLIP-170</b> (200 nM) + tubulin (400 nM)         | 50                | 1 700                     | 34                                 |
| <b>Tubulin</b> (400 nM) + CLIP-170 (200 nM)         | 300               | Droplet 650 / Shell 1 200 | Droplet 2 / Shell 4                |

665  
 666 **Table 1: CLIP-170 , EB3 and tubulin concentration inside droplets.**

667 Protein concentration outside droplets ( $C_{dilute}$ ) and inside droplets ( $C_{droplet}$ ), obtained by calibrating  
 668 fluorescent intensities of GFP, mCherry and Atto-565 see calibration in Figure S9.

669

670  
671  
672  
673  
674  
675

## Supplementary Figures S1-S6

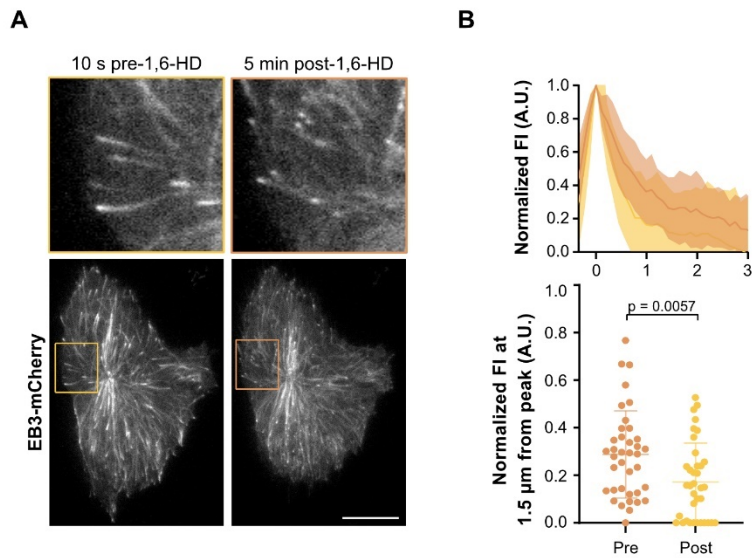

676  
677  
678  
679  
680  
681  
682  
683  
684  
685  
686  
687

### Figure S1: Decrease in EB3 network size upon treatment with 1,6-HD.

(A) Representative images of CRISPR/Cas9 knock-in RPE-1-GFP-Tubulin cells expressing EB3-mCherry before and after 5-minute treatment with 5 % 1,6-hexanediol, with insets. Scale bar: 20  $\mu\text{m}$ . (B) Top: mean fluorescence intensity profile of +TIP-networks before and after 1,6-hexanediol treatment. Bottom: normalized fluorescence intensity of +TIP-networks 1.5  $\mu\text{m}$  away from the peak. Mean with SD of 36-38 +TIP-networks from 6 cells from 2 independent experiments. Statistics: paired t-test. Note that CLIP-170 patches were not dissolved by 1,6-hexanediol treatment.

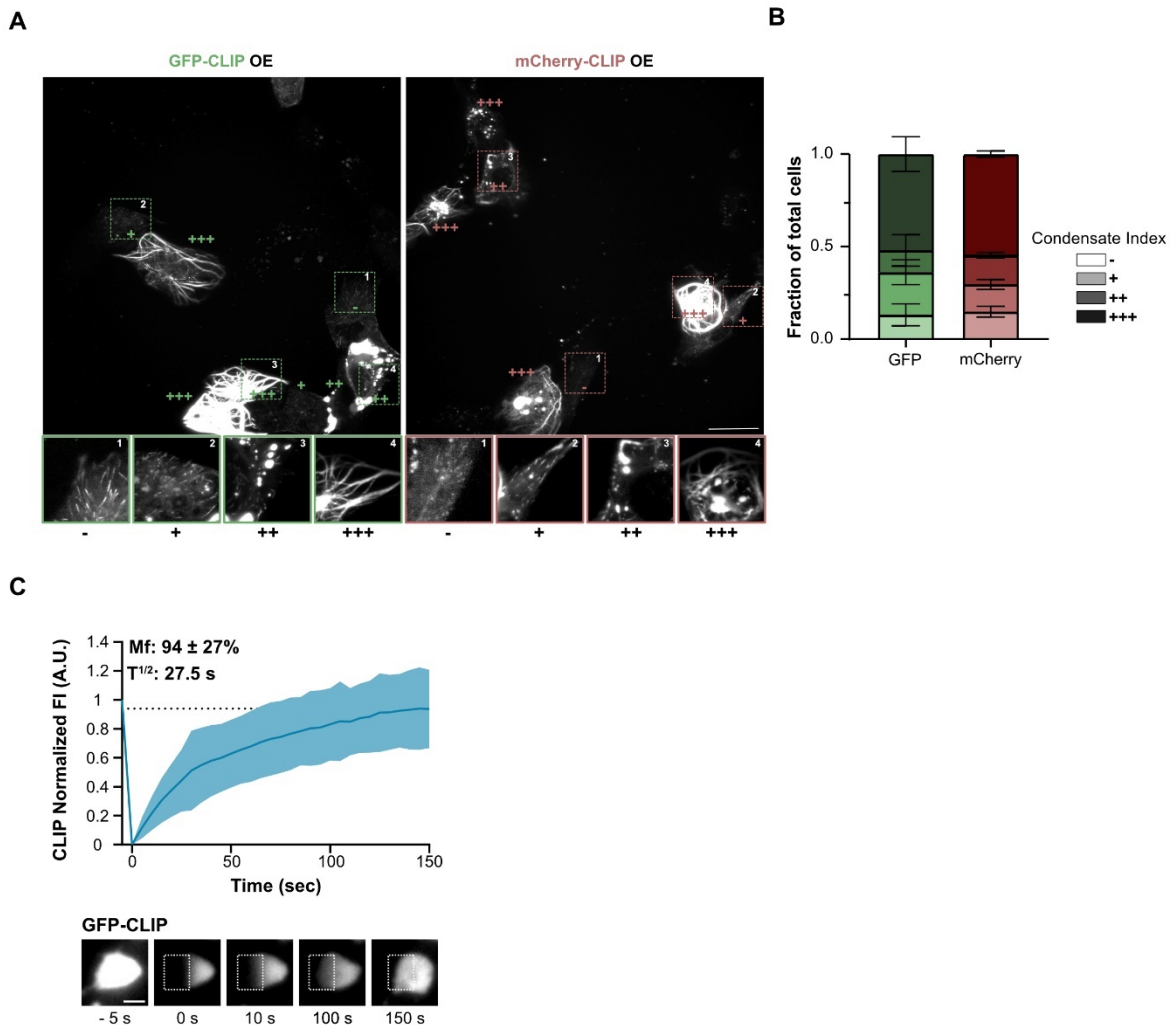

688  
689  
690  
691  
692  
693  
694  
695  
696  
697  
698  
699  
700  
701  
702  
703

**Figure S2: Fluorescent tag do not impact on LLPS of CLIP-170 in cells.**

(A) Representative images (top) with zoom-in (bottom) of RPE-1 cells expressing GFP- (left) or mCherry-CLIP (right) with indicated index for different condensation phenotypes. -: no observed cytoplasmic condensates; +: few small cytoplasmic condensates; ++: several large or many small condensates; +++: many large condensates and/or coating/bundling of microtubules. Note that zoom-in are contrast-adjusted. Scale bar: 30  $\mu$ m. (B) Quantification of condensation index from experiments shown in A. Mean with SD from 2 independent experiments with 100 cells per experiment. (C) Representative TIRF images (bottom) and recovery curve (top) of GFP-CLIP-170 droplets in RPE-1 cells after photobleaching (dashed box). Mean with SD of 3 individual experiments with a total of 36 droplets from 24 cells. Scale bar: 2  $\mu$ m.

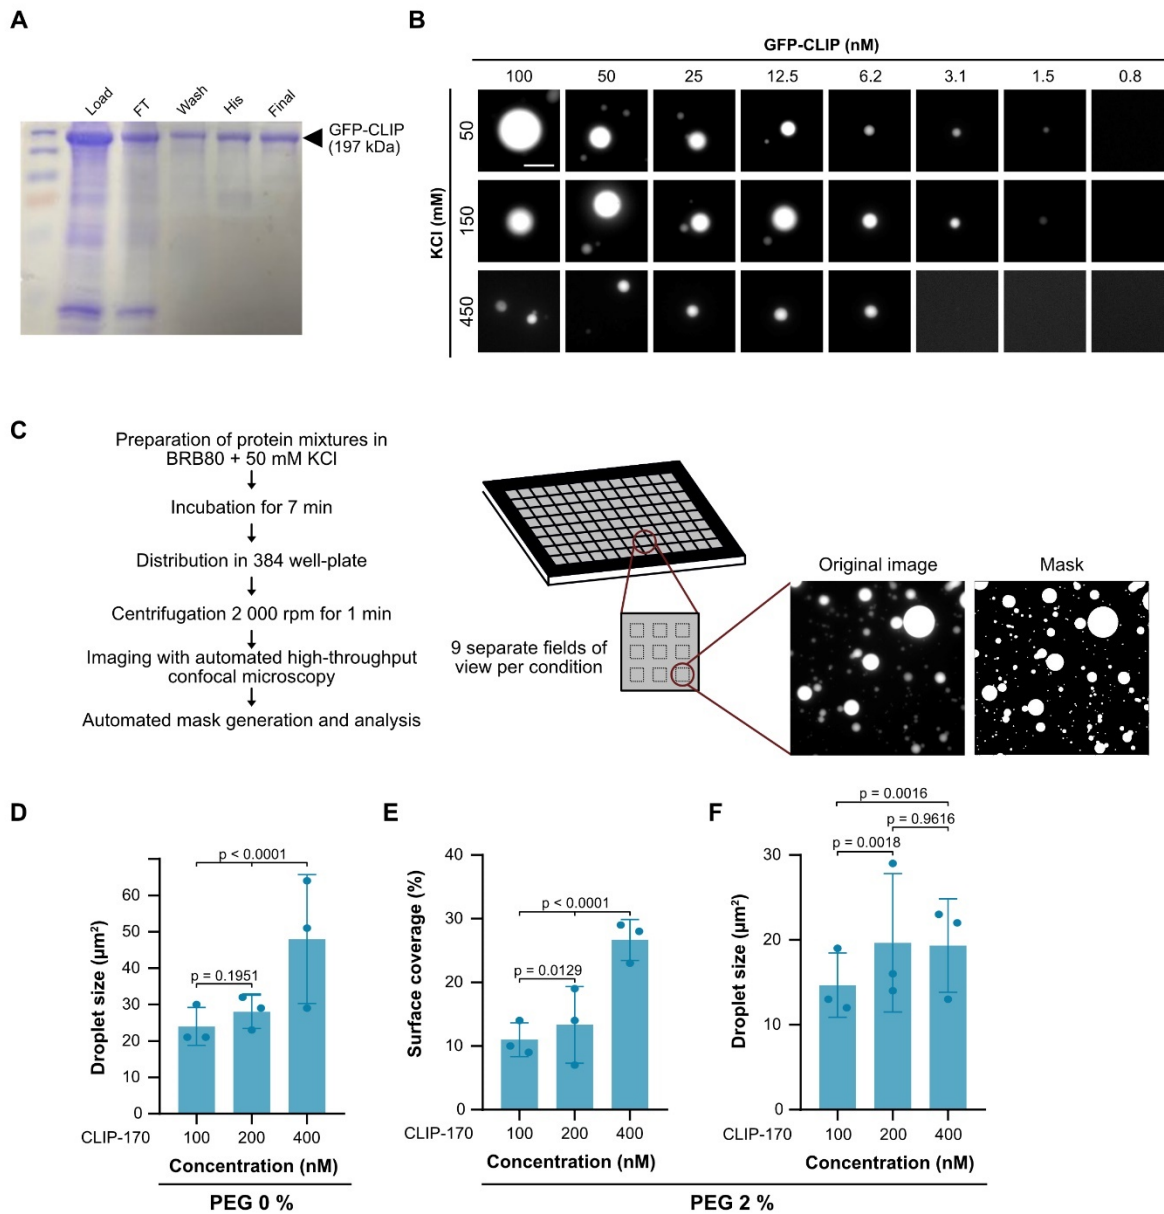

704  
705  
706  
707  
708  
709  
710  
711  
712  
713  
714  
715

**Figure S3: CLIP-170 droplet formation *in vitro* depends on molecular crowding, protein and salt concentrations.**

(A) SDS-PAGE analysis of GFP-FL-CLIP protein purification. Load, lysate loaded onto HisTRAP column; FT, flow through; wash, fractions collected during HisTRAP-column washing; final, final concentrated protein sample post-SEC and post-concentration. (B) Representative images of GFP-FL-CLIP phase diagram for 50, 150 and 450 mM KCl at indicated protein concentrations from 3 independent experiments. Scale bar: 10 µm. (C) Experimental outline for high throughput phase separation assays. For details, see materials and methods. (D) Droplet size (area) for GFP-FL-CLIP condensates at 100, 200, or 400 nM in the absence of PEG. (E) Coverslip surface coverage of GFP-FL-CLIP at the indicated concentrations in the presence of 2% PEG. (F) Droplet size (area) of GFP-FL-CLIP condensates at 100, 200 and 400 nM in the presence of 2% PEG. Mean with SD

716 from 3 independent experiments with a total of 27 fields of view. Statistics: two-tailed Student's *t*-  
 717 test.

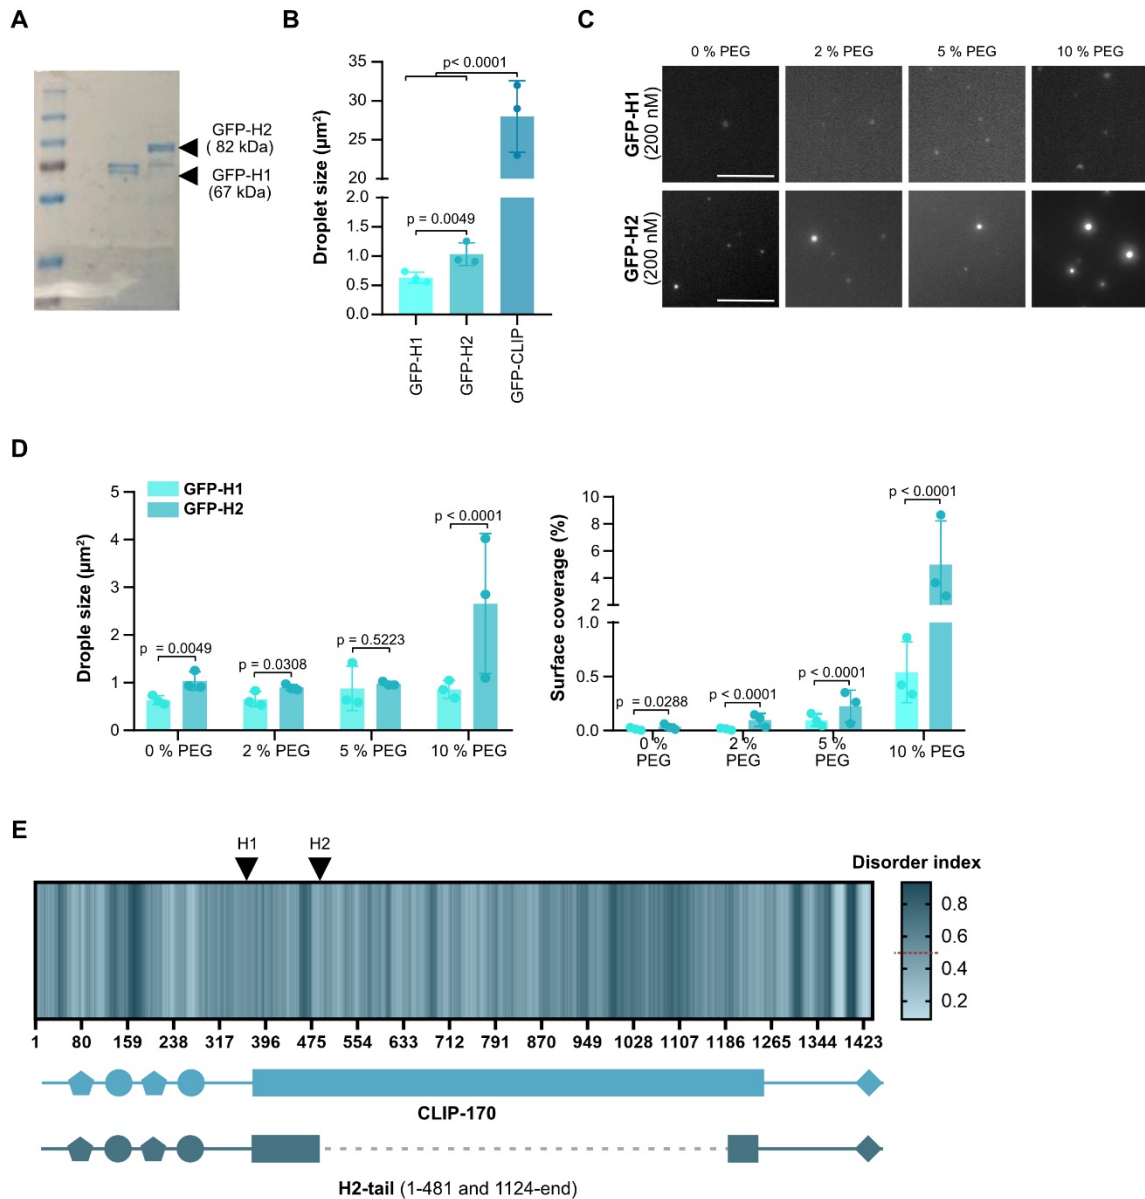

718  
 719 **Figure S4: H2 only weakly undergoes LLPS even under strong molecular crowding**  
 720 **conditions.**

721 (A) SDS-PAGE analysis of purified GFP-H1 and GFP-H2 protein. (B) Droplet size (area) of GFP-  
 722 H2 (200 nM) and GFP-FL-CLIP (200 nM), and aggregate size of GFP-H1 (200 nM) in the absence  
 723 of PEG. Mean with SD from 3 independent experiments with a total of 27 fields of view. Statistics:  
 724 one-way ANOVA test. (C) Representative fluorescence confocal images of A in the presence of  
 725 0, 2, 5 and 10 % PEG. Scale bar: 20  $\mu\text{m}$ . (D) Droplet size (left graph) and surface coverage (right  
 726 graph) of denoted proteins at indicated PEG concentrations. Mean with SD of from 27 fields of  
 727 view from 3 independent experiments. Statistics: two-tailed Student's *t*-test.

728 (E) Top: prediction of intrinsic disorder regions in CLIP-170, based on IUPred2A software. Values  
 729 above the red dotted line (0.5) are considered as disordered (Mészáros et al., 2018). Dark blue  
 730 corresponds to highly disordered regions. Bottom: CLIP-170 and mutant H2-tail secondary  
 731 structures, length of H1 and H2 is indicated, black arrowhead.  
 732

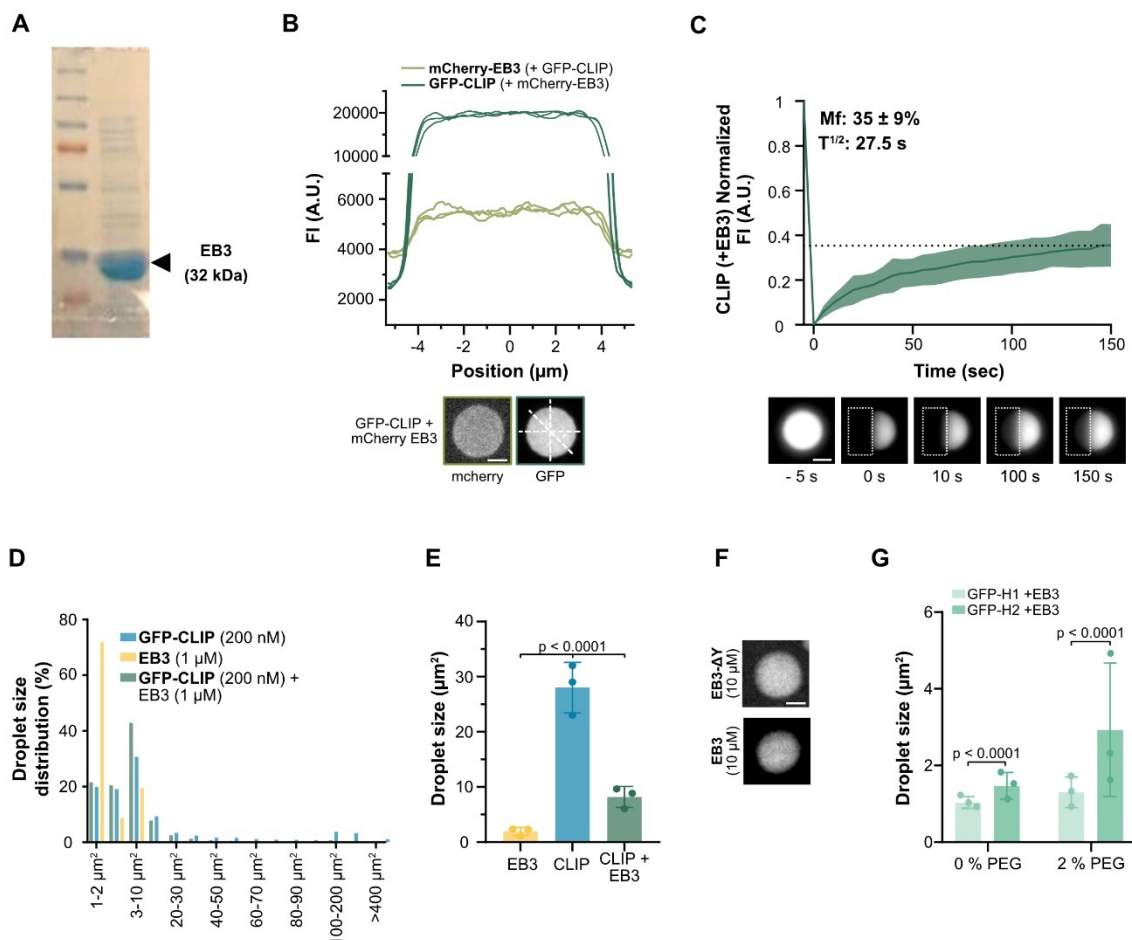

733  
 734 **Figure S5: EB3/CLIP-170 phase separation is driven by the CLIP-170 C-terminal region *in***  
 735 ***vitro*.** (A) SDS-PAGE analysis of purified EB3. (B) Line scan (top) with corresponding images  
 736 (bottom, white lines indicate the line scans) of EB3/FL-CLIP droplets showing a homogenous  
 737 protein distribution. GFP-FL-CLIP (2 μM) EB3 (8 μM unlabeled EB3 + 2 μM mCherry-EB3). (C)  
 738 Representative images and recovery curve of purified EB3/GFP-FL-CLIP (10 μM/ 2 μM) droplets  
 739 after photobleaching (dashed box). Mean with SD of 3 independent experiments with a total of 35  
 740 condensates. Scale bar: 5 μm. (D) Size distribution of GFP-FL-CLIP (200 nM), EB3 (1 μM) and  
 741 the EB3/FL-CLIP droplets in the absence of PEG. Mean size distribution from 3 independent  
 742 experiments with a total of 27 fields of view. (E) Droplet size (area) of unlabeled EB3 (1 μM),  
 743 GFP-FL-CLIP (200 nM) and EB3/FL-CLIP (1 μM + 200 nM) in absence of PEG. Mean with SD  
 744 of 3 independent experiments with a total of 27 fields of view. Statistics: two-tailed Student's *t*-  
 745 test. (F) Representative images of EB3-ΔY condensates (8 μM unlabeled and 2 μM mCherry-  
 746 EB3-ΔY) and EB3 (8 μM unlabeled and 2 μM mCherry-EB3). Scale bar: 4 μm. (G) Condensate



747 size (area) of GFP-H1 (200 nM) or GFP-H2 (200 nM) in the presence of EB3 (1  $\mu$ M) in the absence  
748 or presence of 2% PEG. Mean with SD of 3 independent experiments with a total of 27 fields of  
749 view. Statistics: two-tailed Student's *t*-test.  
750  
751

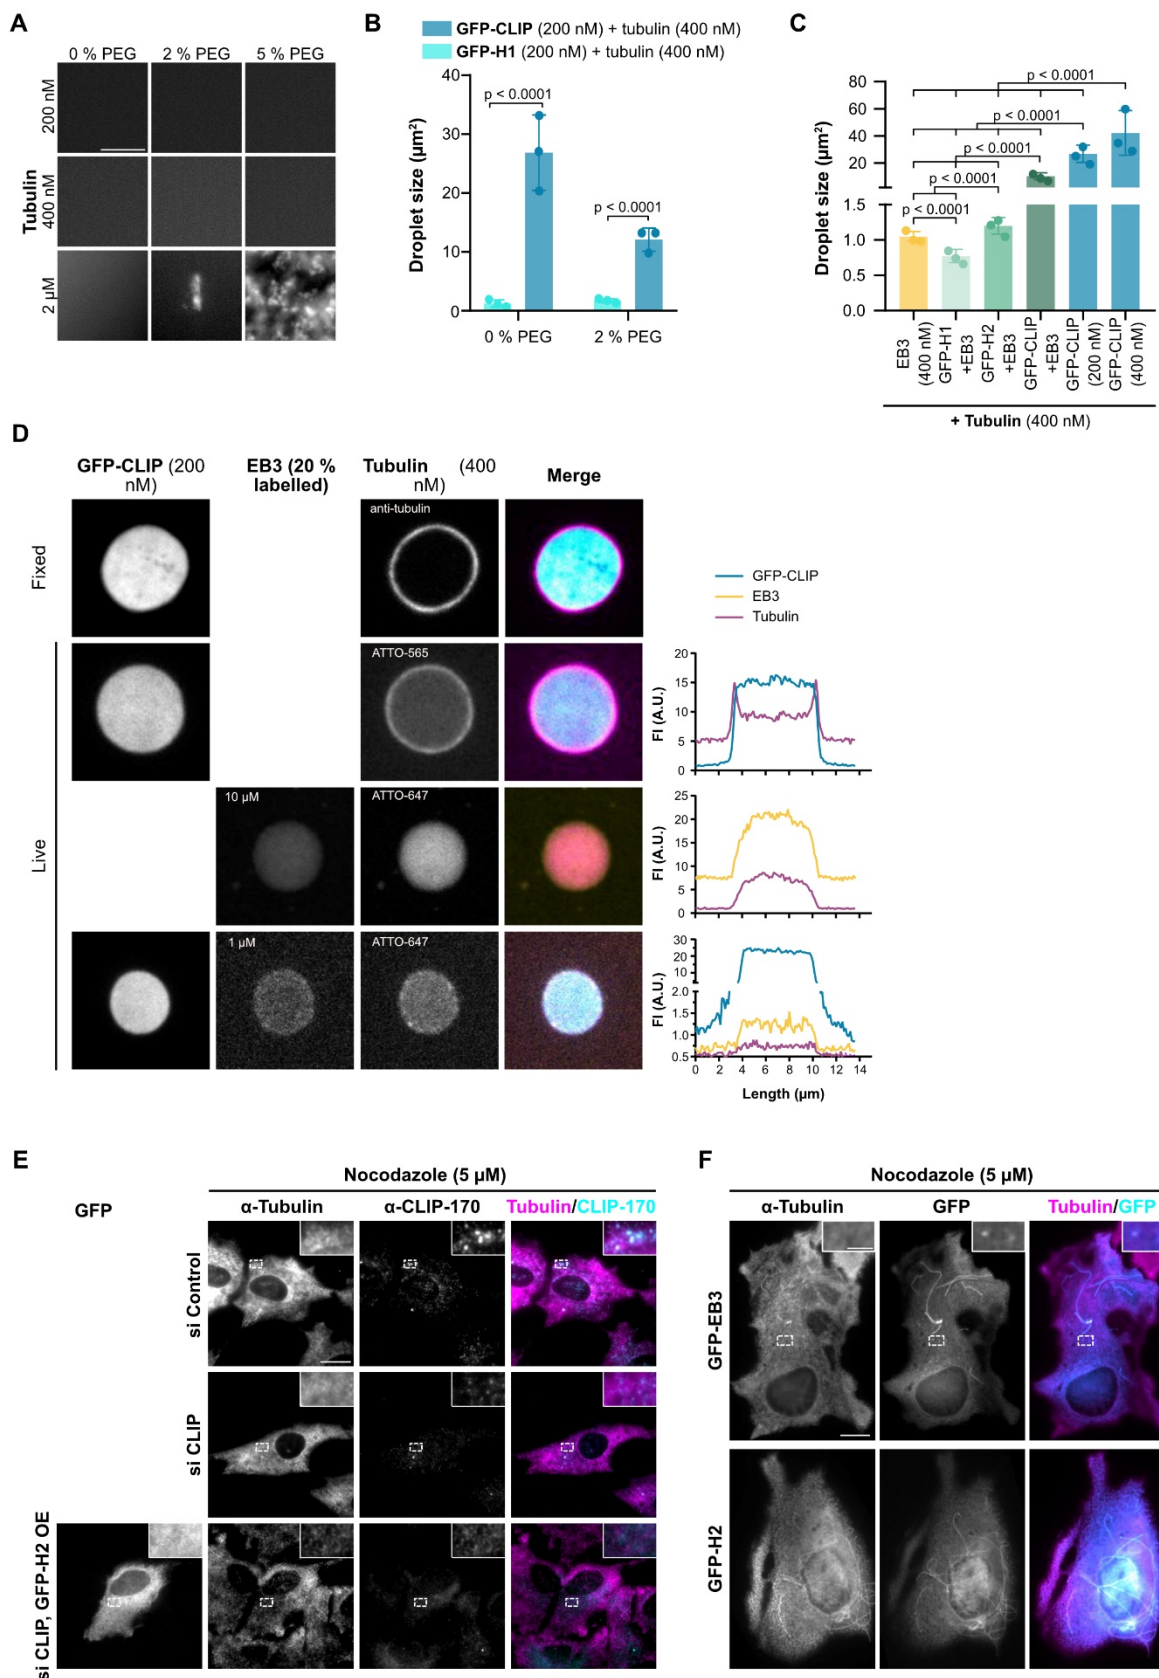

753 **Figure S6: CLIP-170 and EB3 form a tubulin-condensing network.**

754 (A) Representative fluorescence confocal images of purified Atto-565-tubulin at indicated  
755 concentrations in presence of 0, 2 and 5 % PEG. Note that at 2  $\mu$ M tubulin, PEG caused  
756 aggregation (but not condensate formation) of tubulin. Scale bar: 20  $\mu$ m. (B) Quantified droplet  
757 size of Atto-565-tubulin (400 nM) in the presence of GFP-H1 (200 nM) or GFP-FL-CLIP (200  
758 nM) in the absence or presence of 2% PEG. Mean with SD of from 27 fields of view from 3  
759 independent experiments. Statistics: two-tailed Student's *t*-test (right graph). (C) Quantified  
760 droplet size (area) of Atto-565-tubulin (400 nM) in the presence of purified EB3 (1  $\mu$ M), GFP-H1  
761 (200 nM) and EB3 (1  $\mu$ M), GFP-H2 (200 nM) and EB3 (1  $\mu$ M), GFP-FL-CLIP (200 nM) and EB3  
762 (1  $\mu$ M), GFP-FL-CLIP (200nM) alone, and GFP-FL-CLIP (400nM) alone. Mean with SD of three  
763 independent experiments. Statistic: two-tailed Student's *t*-test. (D) Representative images of  
764 tubulin/FL-CLIP droplets (unlabeled tubulin) fixed and immunostained using tubulin specific  
765 antibodies (top). Representative images of GFP-FL-CLIP (200 nM) + tubulin-565 (400 nM)  
766 droplets, EB3 (8  $\mu$ M) + mCherry-EB3 (2  $\mu$ M) + tubulin-647 (4  $\mu$ M) droplets and EB3 (900 nM)  
767 + mCherry-EB3 (100 nM) + GFP-FL-CLIP (200 nM) + tubulin-647 (400 nM) droplets with the  
768 corresponding line scans. Scale bar: 5  $\mu$ m. (E) Representative images of fixed RPE-1 cells  
769 transfected with control siRNA (top panel), CLIP-170 siRNA (middle panel), or CLIP-170 siRNA  
770 rescued with GFP-H2 (bottom panel) treated with 5  $\mu$ M nocodazole for 1 hour and stained for  
771 tubulin. Zoom-in of regions indicated by dashed box. Scale bar: 10  $\mu$ m. (F) Representative images  
772 of fixed RPE-1 cells transfected with GFP-H2 (top panel) or GFP-EB3 (bottom panel) treated with  
773 5  $\mu$ M nocodazole for 1 hour and stained for tubulin. Zoom-in of regions indicated by dashed box  
774 Scale bar: 10  $\mu$ m.

775

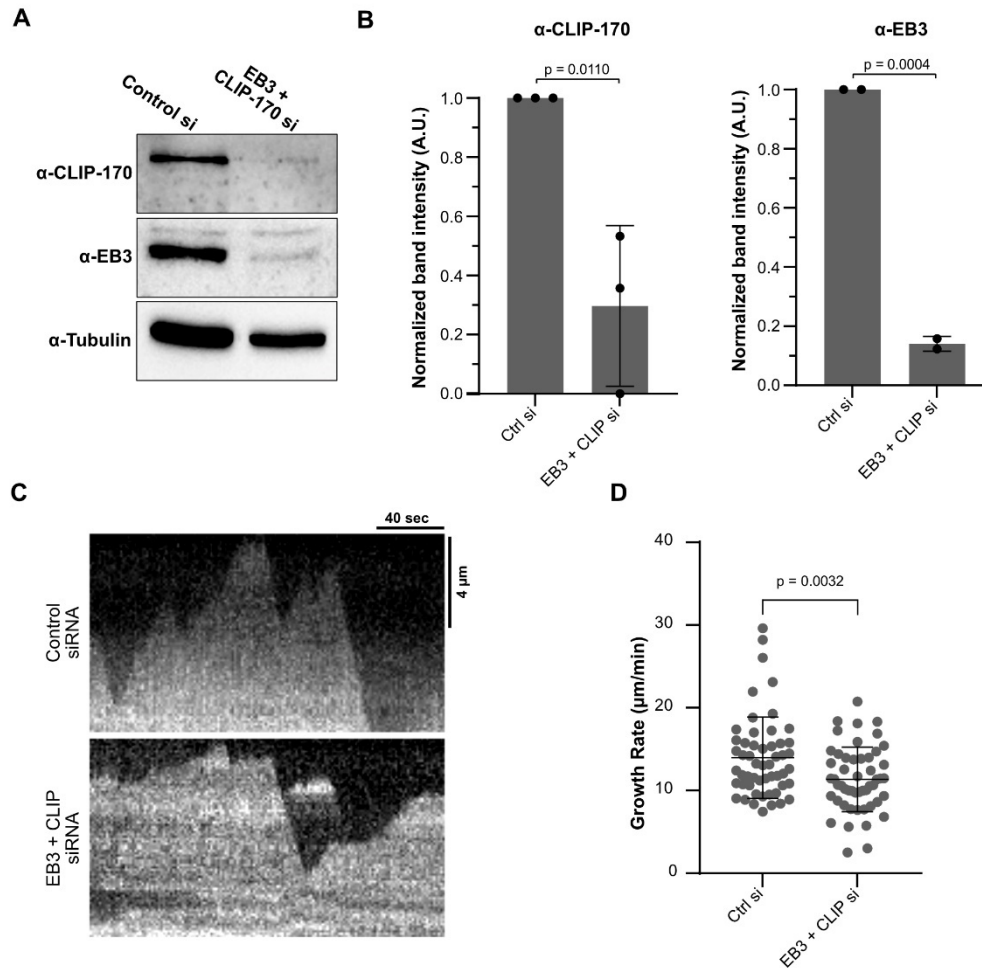

776  
777 **Figure S7: Depletion of EB3/CLIP-170 networks reduce microtubule growth rates in RPE-1**  
778 **cells.**

779 (A) Representative Western Blot of CRISPR/Cas9 knock-in GFP-Tubulin RPE-1 cells transfected  
780 with control siRNA or siRNA to CLIP-170 and EB3 simultaneously for 72 hours. (B)  
781 Quantification of western blot of CLIP-170 depletion (left) and EB3 depletion (right) in cells  
782 treated with either control or EB3 + CLIP-170 siRNAs. Graphs show mean with SD from 3 ( $\alpha$ -  
783 CLIP-170) or 2 ( $\alpha$ -EB3) individual experiments. Statistics: paired t-test. (C) Representative  
784 microtubule kymographs from CRISPR/Cas9 knock-in RPE-1-GFP-Tubulin cells transfected with  
785 either control (top) or EB3 + CLIP-170 (bottom) siRNAs for 72 hours. (D) Mean microtubule  
786 growth rate with SD from: Control – 53 microtubules from 29 cells; EB3 + CLIP siRNA – 51  
787 microtubules from 19 cells (4 independent experiments per condition). In graph, each dot  
788 represents a single microtubule. Statistics: paired t-test.  
789

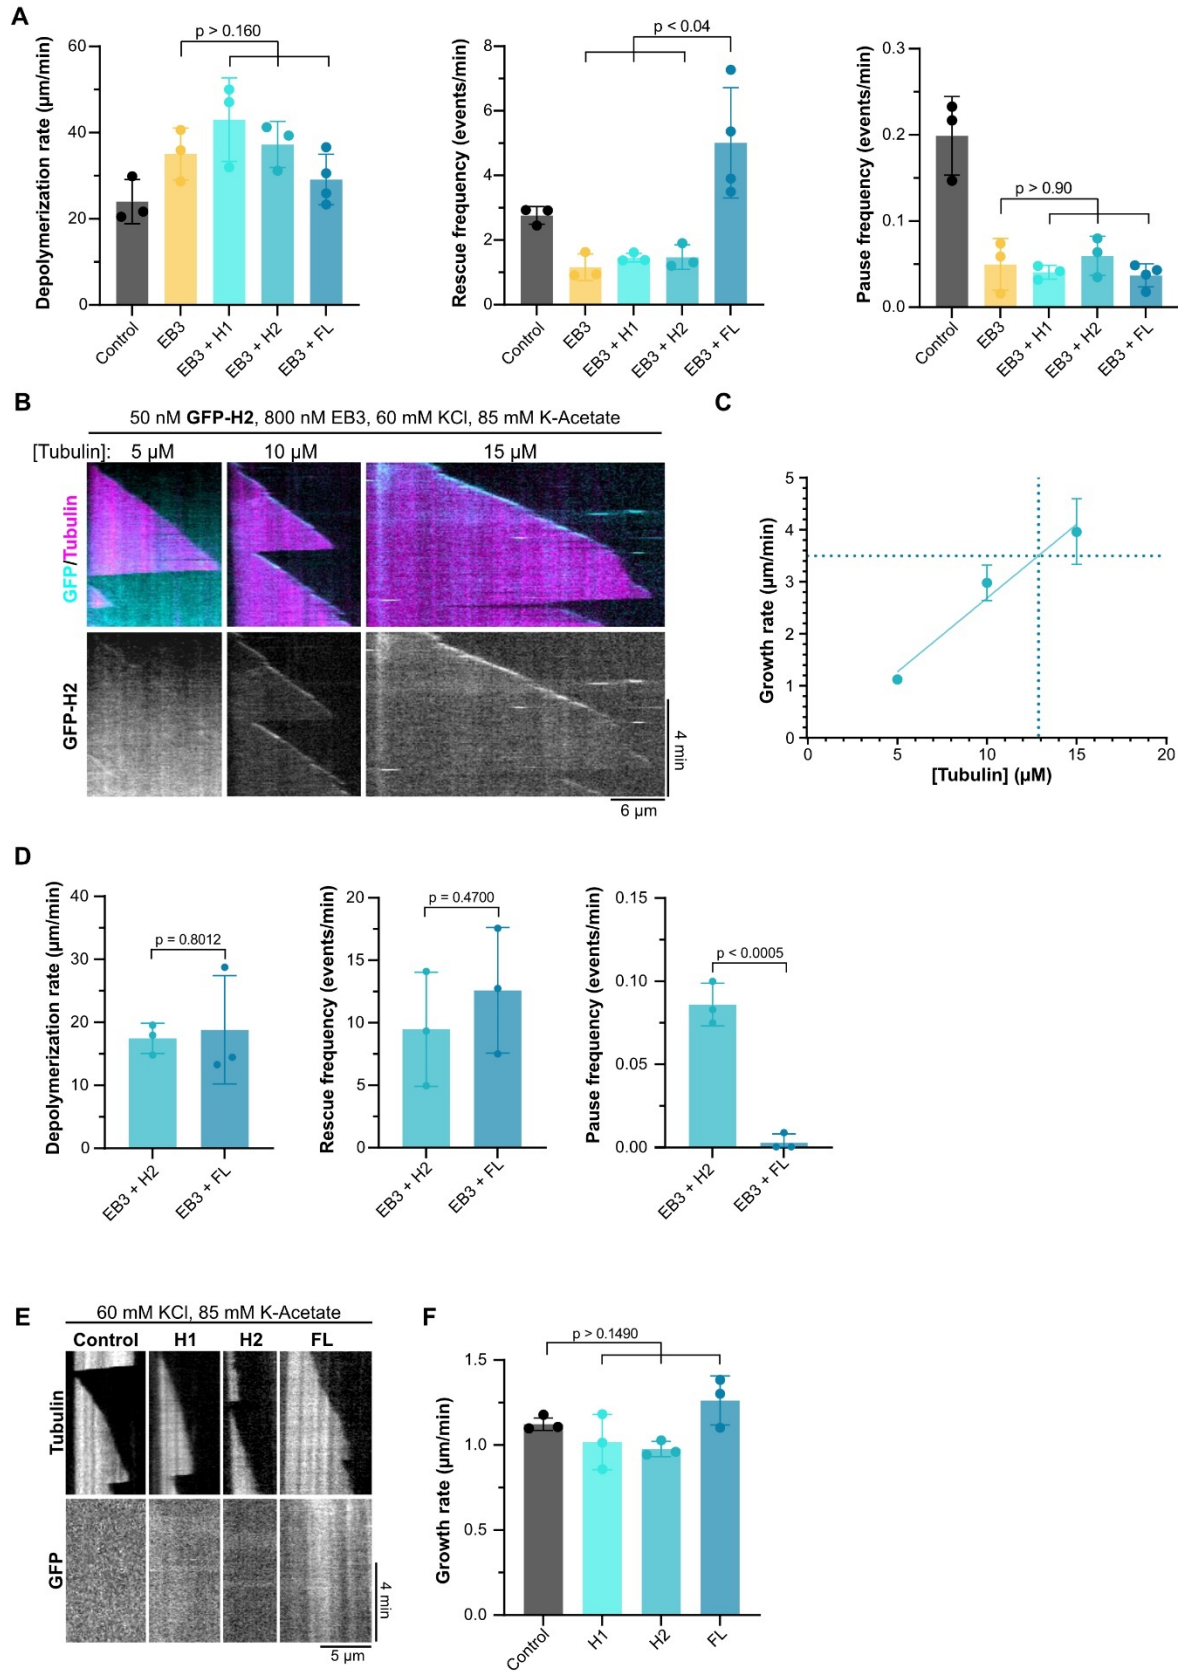

791 **Figure S8: Phase separation potent +TIP-networks impart stronger effects on microtubule**  
792 **dynamics**

793 (A) Microtubule dynamic parameters (depolymerization rate, left; rescue frequency, middle; and  
794 pause frequency, right) for the denoted conditions in 60 mM KCl and 85 mM K-acetate  
795 (corresponding assay to Figure 6B, see here for number of analyzed microtubules). Mean with SD  
796 of three individual experiments. Statistics: one-way ANOVA Fisher's LSD test (B) Representative  
797 microtubule kymographs in the presence of GFP-H2 (50 nM) and EB3 (800 nM) grown at the  
798 denoted tubulin and salt concentrations. (C) Microtubule growth rate from experiments in B. Mean  
799 with SD from three individual experiments. Solid cyan line shows linear regression curve fit.  
800 Dashed blue line indicates concentration of tubulin at which microtubule in presence of EB3/H2  
801 networks grow at 3.8  $\mu\text{m}/\text{min}$  (the speed achieved by EB3/FL-CLIP droplets at 5  $\mu\text{M}$  tubulin;  
802 Figure 6A). (D) Microtubule dynamic parameters (depolymerization rate, left; rescue frequency,  
803 middle; and pause frequency, right) for the denoted conditions in 60 mM KCl (corresponding assay  
804 to Figure 6H, see here for number of analyzed microtubules). Mean with SD from minimum three  
805 independent experimental replicates. Statistics: one-way ANOVA Fisher's LSD test (E)  
806 Representative microtubule kymographs of control (only tubulin), 50 nM GFP-H1, 50 nM GFP-  
807 H2 or 50 nM FL-CLIP. (F) Microtubule growth rate from experiments in Figure E. Mean with SD  
808 from three independent experiments. Total number of MTs analyzed per condition: Control – 48;  
809 H1 – 42; H2 – 41; FL – 26. Statistics: one-way ANOVA Fisher's LSD test.

810  
811  
812  
813

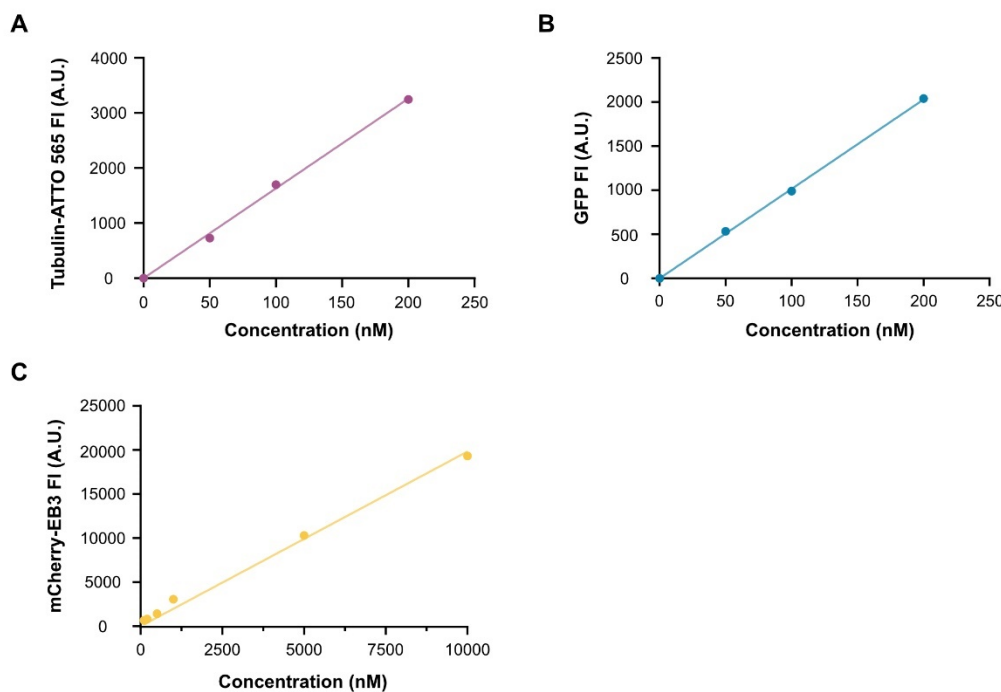

814  
815  
816  
817

**Figure S9: Calibration curve for Tubulin-ATTO 565 , mCherry-EB3 and GFP.**

818 Calibration curve between fluorescent intensity and concentration of: (A) Tubulin-ATTO 565 at  
819 50, 100 and 200 nM. (B) GFP at 50, 100 and 200 nM and (C) mCherry-EB3 at 100, 200, 500, 5  
820 000 and 10 000 nM.

821  
822

823 **Movie 1:** Representative foci formation resembling fission in GFP-CLIP overexpressing RPE-1  
824 cells. Scale bar: 2  $\mu\text{m}$ .

825

826 **Movie 2:** Representative CRISPR/Cas9 knock-in GFP-tubulin RPE-1 expressing mCherry-EB3  
827 and treated with 5% 1,6-hexanediol (added at 00:30).

828

829 **Movie 3:** Representative CRISPR/Cas9 knock-in GFP-tubulin RPE-1 expressing mCherry-CLIP.  
830 Inset highlights fusion of mCherry-CLIP droplets.

831

832 **Movie 4:** Representative CRISPR/Cas9 knock-in GFP-tubulin RPE-1 expressing mCherry-CLIP.  
833 Inset highlights fission of mCherry-CLIP droplets.

834

835 **Movie 5:** Fluorescence recovery after photobleaching of a mCherry-CLIP droplet in a  
836 representative CRISPR/Cas9 knock-in GFP-tubulin RPE-1 .

837

838 **Movie 6:** Fusion of two GFP-CLIP droplets (1  $\mu\text{M}$ ) *in vitro*.

839

840 **Movie 7:** Fluorescence recovery after photobleaching of a purified GFP-CLIP droplet (2  $\mu\text{M}$ ) *in*  
841 *vitro*.

842

843 **Movie 8:** Representative CRISPR/Cas9 knock-in GFP-tubulin RPE-1 (magenta) expressing  
844 mCherry-H1 (cyan).

845

846 **Movie 9:** Representative CRISPR/Cas9 knock-in GFP-tubulin RPE-1 (magenta) expressing  
847 mCherry-H2 (cyan).

848

849 **Movie 10:** Fluorescence recovery after photobleaching of a purified EB3 (10  $\mu\text{M}$ ) labeled with  
850 GFP-EB3 (100 nM) droplet *in vitro*.

851

852 **Movie 11:** Fluorescence recovery after photobleaching of a purified EB3 (10  $\mu\text{M}$ ) labeled with  
853 GFP-EB3 (100 nM) mixed with GFP-CLIP (2  $\mu\text{M}$ ) droplet *in vitro*.

854

855 **Movie 12:** 3D representation of EB3 (8  $\mu\text{M}$ ) labelled with mCherry- EB3 (2  $\mu\text{M}$ ) droplets *in*  
856 *vitro*. Note that floating droplets moved during image acquisition.

857

858 **Movie 13:** 3D representation of GFP-CLIP (2  $\mu\text{M}$ ) droplets *in vitro*.

859

860 **Movie 14:** 3D representation of GFP-CLIP (2  $\mu\text{M}$ ) mixed with EB3 (8  $\mu\text{M}$ ) labelled with  
861 mCherry- EB3 (2  $\mu\text{M}$ ) droplets *in vitro*. Note that floating droplets moved during image  
862 acquisition.

863

864 **Movie 15:** Representative *in vitro* microtubule dynamics assay of Atto-565 tubulin (magenta)  
865 polymerized in the presence of 50 nM GFP-FL-CLIP (cyan) and 800 nM EB3 in high salt buffer.  
866  
867 **Movie 16:** Representative *in vitro* microtubule dynamics assay of Atto-565 tubulin (magenta)  
868 polymerized in the presence of 50 nM GFP-FL-CLIP (cyan) and 800 nM EB3 in low salt buffer.  
869



## 870 **Methods**

### 871 *Cell culture and treatments*

872 Parental RPE1 and CRISPR/Cas9 knock-in RPE1-GFP-tubulin cells were cultured in high glucose  
873 Dulbecco's Modified Eagle's Medium F12 (DMEM, ThermoFisher, 113057) supplemented with  
874 10 % Fetal Bovine Serum (FBS, ThermoFisher, 10270106) and 1 % penicillin-streptomycin  
875 (Gibco, 15140122) at 37°C with 5 % CO<sub>2</sub>. The cell lines were monthly checked for mycoplasma  
876 contamination. CRISPR/Cas9 knock-in GFP-tubulin RPE-1 cells were generated using the same  
877 guide RNA and protocol as in Andreu-Carbó et al., 2022.

878 For transient expression studies of exogenous FL-CLIP, H1, H2 and EB3, cells were transfected  
879 using the jetOPTIMUS transfection reagent (Polyplus) with 0.5 µg DNA according to the  
880 manufacturer's instructions. Transfection media was replaced with fresh culture media 8 hours  
881 post-transfection, and cells were imaged 15-24h after transfection.

882 For experiments in which endogenous CLIP-170 was depleted, parental RPE1 cells were  
883 transfected with 10 nM siRNA targeting CLIP-170 (Santa Cruz Biotechnology) using  
884 lipofectamine RNAiMAX reagent (Invitrogen) according to the manufacturer's instructions. Media  
885 was replaced the following morning, and cells were cultured for 72 hours post-transfection before  
886 fixation, or transfected with GFP-H2 24 hours pre-fixation for "knockdown-rescue" experiments  
887 with H2. For control experiments, cells were transfected with Allstars Negative Control siRNA  
888 (QIAGEN). For CLIP-170 + EB3 depletion experiments, cells were transfected with dual siRNA  
889 mixes targeting EB3 (Thermo Fisher, s22683) and CLIP-170 (Santa Cruz, 43281). Transfection  
890 media was replaced with fresh culture media 8 hours post-transfection, and cells were imaged 72  
891 hours post-transfection.

892 To depolymerize the microtubule network, cells were treated with 5 µM nocodazole (Sigma,  
893 M1404; diluted in culture medium) for 1 hour prior to fixation. For experiments using 1,6-  
894 hexanediol (Sigma), cells were treated with 5% 1,6-hexanediol (diluted in culture medium) for 10  
895 minutes.

896

### 897 *Cloning*

898 The in-cell expression vector for mCherry-FL-CLIP170 was generated by excising GFP from a  
899 GFP-FL-CLIP170 vector (a kind gift from Thomas Surrey) using AgeI/BsrG1 restriction sites and  
900 replacing it with mCherry containing AgeI/BsrG1 overhangs generated by PCR. From this vector,  
901 we generated mCherry-tagged H1- and H2-CLIP170 by PCR and reinsertion using the XhoI/KpnI  
902 restriction sites (N-terminal XhoI primer: 5'-CCGCTCGAGCTCAAGCTTCGATGAGTAT  
903 GCTGAAACCCAGCGGGCTGAA-3', C-terminal KpnI H1 primer:

904 5'-CGGGGTACCGTCGACTCAAGTGGTGCCCGAGATCTTGCGGGC-3',

905 and C-terminal KpnI H2 primer: 5'-CGGGGTACCGTCGACTCATTGTGTCAGCTTTGGTCTT  
906 TTCAAAGAGCAGGCTCTGTTC-3'). Protein purification vectors for GFP-H1- and H2-CLIP  
907 were generated by PCR from the GFP-FL-CLIP-170 vector using a primer with an overhang for  
908 the NdeI restriction site as well as an N-terminal TEV protease site (5'-  
909 GCGGCAGCCATATGGAAAACCTGTATTTCCAGGGAAGTGCCACCATGGTGAGCAAG

910 GGCGAGGAGCTGTTCA-3'), and C-terminal primers specific to each CLIP truncation with  
911 overhangs corresponding to the *ScaI* restriction site (H1: 5'-CCTTATCAAGTACTA  
912 GTGGTGTCCCGAGATCTTGCGGGCGTAGCGGGAAG-3') (H2: 5'-CCTTATCAAGTACTT  
913 CATTGTGTCAGCTTTGGTCTTTTCAAAGAGCAGGCTCTGTTCAAGC-3'), then cloned into  
914 an empty pET28a-6His vector (a kind gift from Natacha Olieric, Paul Scherrer Institute) using  
915 *NdeI/ScaI* restriction sites.

916  
917 For the GFP-H2-tail construct Gilson assembly was used from the GFP-FL-CLIP construct using  
918 the primer 5'- CAAGCTTCGAATTCTATGCTGAAACCCAGCGGGCTGAAGG with *BstBI*  
919 (Start of H2), CAGCTCTGCGTCCTTCTCTTTGTCAGCTTTGGTCTTTTCAAAGAGCAG-3'  
920 (end of H2), 5'- GCTGACAAAGAGAAGGACGCAGAGCTGGAGAAGCTGAGGAATGAG  
921 (start of tail) and CCGCGG TACCGTCTGACTCAGAAGGTCTCATCGTCTGTTGCAGTTGG  
922 (end of tail) using the PKPN enzyme.

923  
924 A protein purification vector for mCherry-6His-EB3 was a kind gift from Natacha Olieric (Paul  
925 Scherrer Institute). From this vector, mCherry was excised using *AgeI/BsrGI* restriction sites to  
926 produce an untagged 6His-EB3 vector for purification. Mutagenesis of the mCherry-6His-EB3  
927 was used to create the EB3- $\Delta$ Y281, the primer used were 5'-CAAGAAGACCAGGAC  
928 GAGTAACAGTAAAGGTGGATAC and GTATCCACCTTTACTGTTACTCGTCTGTTCTT  
929 CTTG-3'.

930 For in-cell expression of EB3, EB3-mCherry vectors were obtained from Addgene (Addgene  
931 plasmid 55037).

932

### 933 *Imaging*

934

#### 935 *Microscope*

936 For in-cell studies and *in vitro* microtubule dynamics experiments, imaging was performed on an  
937 Axio Observer Inverted TIRF microscope (Zeiss, 3i) equipped with a Prime 95B BSI  
938 (Photometrics) using a 100X objective (Zeiss, Plan-Apochromat 100X/1.46 oil DIC (UV) VIS-  
939 IR). SlideBook 6 X 64 software (version 6.0.22) was employed to record time-lapse imaging. For  
940 *in vitro* microtubule dynamics and cell imaging, microscope stage conditions were controlled with  
941 the Chamlide Live Cell Instrument incubator (37°C for *in vitro* experiments, supplemented with 5  
942 % CO<sub>2</sub> for live cell experiments).

943

944 For stack acquisition and intensity measurement a 3i Marianas spinning disk confocal setup based  
945 on a Zeiss Z1 stand, a 100× PLAN APO NA 1.45 TIRF objective and a Yokogawa X1 spinning  
946 disk head followed by a 1.2× magnification lens and an Evolve EMCCD camera (Photometrics).  
947 Fast z-stack acquisition (0.5- $\mu$ m steps) was obtained using a piezo stage (Mad City Labs). Single-  
948 emitter emission filters were always used to avoid bleed-through and each channel was acquired  
949 sequentially.

950

951 *Microtubule dynamics*

952 For *in vitro* and *in cell* microtubule dynamics measurements images were taken every second for  
953 3 minutes. Microtubules were tracked individually using the Freehand-Line tool in ImageJ (15-  
954 pixel width) and kymographs were built using the KymographBuilder plugin. Microtubule growth  
955 speeds were then calculated by manually tracing the slopes of kymographs using the Straight-Line  
956 tool in ImageJ and extracting dynamic parameters the slopes using a custom-written code.

957 *Fluorescence recovery after photobleaching*

958 Fluorescence recovery after photobleaching (FRAP) experiments in cells were performed in square  
959 regions (4x4  $\mu\text{m}$ ) with a 656 nm laser at 20% intensity. The normalized fluorescence intensity was  
960 calculated using the formula  $F(t)_{norm} = \frac{F(t)_{ROI} - F_{bck}}{F(t)_{ctrl} - F_{bck}} \times \frac{F(i)_{ctrl} - F_{bck}}{F(i)_{ROI} - F_{bck}}$  where  $F(t)_{ROI}$  and  $F(t)_{ctrl}$  are  
961 respectively the ROI and the control fluorescence intensity before the FRAP,  $F_{bck}$  the background  
962 fluorescence and  $F(i)_{ROI}$  and  $F(i)_{ctrl}$  are respectively the ROI of the unbleached part of the  
963 condensate at one timepoint (i) (Day et al., 2012).

964

965 *+TIP-network analysis in 1,6-hexanediol-treated cells*

966 For experiments in cells treated with 1,6-hexanediol, images were taken in a single z-plane every  
967 10 seconds for 10 minutes. 1,6-Hexanediol (5 %) was added after one minute, and cells were only  
968 analyzed if they did not undergo any large-scale changes in morphology, as 1,6-hexanediol  
969 treatment has been noted to affect mammalian cell shape (Wheeler et al., 2016). For “pre-  
970 treatment” time points, all in-focus +TIP-networks on the cell periphery were analyzed in the time  
971 frame 10 seconds prior to hexanediol addition using the Segmented-Line tool in ImageJ to obtain  
972 fluorescence intensity. For “post-treatment” time points, the same strategy was applied to the time  
973 frame 5 minutes after hexanediol addition.

974

975 *Immunofluorescence*

976 15-24 hours post-transfection (or post-seeding for non-transfected cells), cells were fixed with  
977 100% methanol for 5 min at -20°C and then for 15 min with 3% paraformaldehyde at room  
978 temperature. Cells were then permeabilized for 10 minutes with 0.15% by volume Triton-X 100  
979 (Sigma) in PBS followed by 10 minutes with 0.1% Tween-20 (AppliChem) in PBS, washed  
980 thoroughly in a solution of 0.05% Tween-20 in PBS (hereafter referred to as PBS-T), and  
981 subsequently blocked with 2% bovine serum albumin (in PBS) for 1h. Post-blocking, cells were  
982 incubated overnight with antibodies targeting tubulin (Sigma T6199, DM1 $\alpha$ , 1:1000, mouse), EB1  
983 (Millipore AB 6057, rabbit, 1:1000), EB3 (Santa Cruz Biotechnology sc-101475, KT36, rat,  
984 1:200), or CLIP-170 (Santa Cruz Biotechnology sc-28325, F3, mouse, 1:500). Primary antibodies  
985 were diluted to the appropriate concentration in 2% bovine serum albumin in PBS. The following  
986 day, cells were subjected to three five-minute washes at room temperature in PBS-T, then  
987 subsequently incubated in secondary antibodies (Invitrogen, species-specific IgG conjugated to  
988 Alexa-647, 568, or 488 fluorophores) at room temperature for one hour. Cells were subjected to  
989 three additional PBS-T washes, and coverslips were mounted onto glass microscopy slides (Glass

990 technology) using ProLong™ Diamont Antifade Mountant. Coverslips were sealed with nail  
991 polish and stored at 4°C until imaging.

992

### 993 *Tubulin purification from bovine brain and labelling*

994 Tubulin was purified from fresh bovine brain by two subsequent polymerization/depolymerization  
995 cycles as described previously (Andreu-Carbó et al., 2022). Tubulin labelling with biotin or  
996 ATTO-488, -565, -647 fluorophores was performed as described (Andreu-Carbó et al., 2022), and  
997 final labelling ratios to polymerize microtubules were 11% for ATTO-488 and 13% for ATTO-  
998 565 tubulin.

999

### 1000 *Protein purification*

1001 For purification of EB3, mCherry-EB3, EB3-ΔY and mCherry-EB3-ΔY, *E. coli* BL21 (DE3) cells  
1002 were transformed with 6-His-tagged EB3-encoding plasmids and induced for expression overnight  
1003 with 1 mM IPTG at 20°C under rotation at 200 rpm. All following steps were performed at 4°C.  
1004 The morning after induction, cells were lysed by in lysis buffer (20 mM Tris pH 7.5, 300 mM  
1005 NaCl) supplemented with 1% Triton-X 100 and protease inhibitors cocktail tablets (Roche) and  
1006 sonicated. Cell debris were then cleared by ultracentrifugation. The cleared lysate was  
1007 subsequently loaded onto a pre-equilibrated HisTrap column (GE Healthcare 1mL HisTrap  
1008 column) using an ÄKTA Pure Protein Purification System (GE Healthcare). After washing the  
1009 column in lysis buffer, elution buffer (20 mM Tris pH 7.5, 300 mM NaCl, 1 M imidazole) was  
1010 applied to the column in a 1% gradient. Eluted protein fractions were pooled and concentrated  
1011 using Amicon 30K Centrifugal filters (Millipore). The concentrated, cleared protein was subjected  
1012 to size-exclusion chromatography using a HiLoad 16/600 Superdex column (GE Healthcare) in  
1013 lysis buffer. Protein-containing fractions were harvested, pooled, and concentrated. Protein was  
1014 supplemented with 20% glycerol, aliquoted, snap-frozen and stored at -80°C.

1015 GFP-H1, GFP-H2 and GFP-H2-tail were purified using the same scheme as EB3, with the  
1016 following differences: (1) the lysis buffer was 50 mM potassium phosphate pH 7.5, 500 mM NaCl,  
1017 1 mM MgCl<sub>2</sub>, and 1 mM β-mercaptoethanol. (2) Between applying protein to the HisTrap column  
1018 and elution, the column was washed with lysis buffer supplemented with 8 mM Imidazole. (3) H1-  
1019 and H2-CLIP were eluted from the HisTrap column using lysis buffer + 300 mM Imidazole, and  
1020 protein-containing fractions were subjected to tobacco etch virus (TEV) protease treatment  
1021 overnight to remove His tags prior to size-exclusion chromatography.

1022 FL-CLIP170-GFP was purified from insect cells as described previously (Telley et al., 2011). A  
1023 plasmid encoding FL-CLIP170-GFP in pFasBacHTa (a kind gift from Thomas Surrey) was used  
1024 to generate Baculovirus, which was subsequently used to infect Sf9 cells. Cells were harvested  
1025 and lysed with lysis buffer (30 mM HEPES pH 7.4, 400 mM KCl, 20 mM Arginine, 20 mM  
1026 potassium-glutamate, 0.01% Birj35, 2 mM MgCl<sub>2</sub>, 10 mM β-mercaptoethanol) supplemented with  
1027 20 mM imidazole and protease inhibitor tablets (Roche) using dounce homogenization. Cell debris  
1028 were cleared by ultracentrifugation, and cleared lysate was loaded onto a HisTrap column (GE  
1029 Healthcare). The column was washed with lysis buffer supplemented with 50 mM imidazole, then

1030 eluted with lysis buffer supplemented with 300 mM imidazole. Protein-containing fractions were  
1031 pooled and further cleared by a second centrifugation, then subjected to size-exclusion  
1032 chromatography using a HiLoad 16/600 Superdex column (GE Healthcare) in lysis buffer (lacking  
1033 Birj35). Only proteins coming off with a clean, single peak profile from the Superdex column were  
1034 used. Protein-containing fractions were pooled and concentrated and used immediately (maximal  
1035 5 hrs after purification), as FL-CLIP was prone to degradation and loss of activity after freezing  
1036 as previously noted (Telley et al., 2011). For all purified proteins, protein concentration was  
1037 measured by Bradford assay.

1038

### 1039 *Phase separation assay*

1040 For in vitro phase separation assays, proteins were diluted to the appropriate concentration in  
1041 BRB80 supplemented with 50 mM potassium chloride and PEG 4000 (0, 2, 5 or 10 % by weight)  
1042 in Eppendorf tubes. After thorough mixing, reactions were transferred to 384-well plates (Falcon)  
1043 and incubated for 7 min. The plate was then centrifuged at 2000 rpm for 1 min to sediment proteins  
1044 in the dense phase on the well bottoms. Images were acquired using a confocal automated  
1045 microscope (Molecular Device) with a 60X dry objective. For each reaction, 9 times 2048 x 2048  
1046 px fields of view were acquired with one focal plane (Figure S1A). Automated analysis was  
1047 performed using MetaXpress Custom Module editor software. From fluorescence intensity, masks  
1048 were generated to differentiate condensates from the background and the area sum was calculated  
1049 together with the condensate versus background fluorescence intensity.

1050

### 1051 *Droplet-Pelleting assay*

1052 For the droplet-pelleting assays to determine amount of protein in the dense phase (Figure 5A)  
1053 proteins were diluted to the appropriate concentrations (1  $\mu$ M CLIP, 10  $\mu$ M EB3, or 1  $\mu$ M CLIP  
1054 + 10  $\mu$ M EB3) in BRB supplemented with 125 mM potassium chloride and incubated at room  
1055 temperature for 30 minutes. Following this incubation, reaction mixtures were centrifuged at  
1056 16,900 g at room temperature for 15 minutes using a Fresco 21 Heraeus tabletop centrifuge  
1057 (Thermo Scientific). The supernatant was collected, and pellets were resuspended in an equal  
1058 volume of resuspension buffer (BRB80 + 125 mM KCl). Pellets and supernatants from each  
1059 reaction were run on SDS-PAGE gels, which were subsequently stained with QuickBlue Protein  
1060 Stain Coomassie dye (Lubio Science) for at least 2 hours before destaining in water. The fraction  
1061 of protein in dense vs dilute phase was calculated by dividing the integrated Coomassie band  
1062 intensity from the pellet or supernatant, respectively, by the sum of the integrated band intensity  
1063 of the pellet and supernatant. Fold-change in pellet fraction was taken by dividing the protein  
1064 fraction in the pellet for experiments with CLIP + EB3 by the protein fraction in the pellet for each  
1065 protein alone.

1066

### 1067 *Fixation of FL-CLIP droplets*

1068 For experiments in which FL-CLIP droplets were fixed to observe whether unlabeled tubulin  
1069 partitions into droplets (Figure S6B), GFP-CLIP (200 nM) was incubated with unlabeled purified

1070 bovine brain tubulin (400 nM) on coverslips for 15 minutes. Reactions were fixed directly on  
1071 coverslips with 3% PFA for 15 minutes, washed 3 times in PBS, blocked and stained with  
1072 antibodies to tubulin as described in the above immunofluorescence procedure.

1073

#### 1074 *Calibration curve*

1075 To measure the concentration of proteins in the dilute and in the droplet phase, calibration curves  
1076 were established for GFP, tubulin-565 and mCherry-EB3. To avoid mCherry-EB3 phase  
1077 separation a buffer with 1M NaCl was used. To establish the curve the following concentrations  
1078 were used: GFP (50, 100 and 200 nM); mCherry-EB3 (100, 200, 500, 5 000 and 10 000 nM); and  
1079 tubulin (50, 100 and 200 nM).

1080

#### 1081 *Coverslip treatment and Flow chamber preparation*

1082 For *in vitro* microtubule dynamics studies, slides and coverslips were cleaned by two successive  
1083 30-minute sonication cycles in 1 M NaOH followed by 96% ethanol with thorough rinsing in bi-  
1084 distilled water between each step. After drying, slides and coverslips were plasma treated  
1085 (Electronic Diener, Plasma surface technology) and subsequently incubated for 48 hours with tri-  
1086 ethoxy-silane-PEG (Creative PEGWorks) or a 1:5 mix of tri-ethoxy-silane-PEG-biotin: tri-ethoxy-  
1087 silane-PEG (final concentration 1 mg/ml) in 96 % ethanol and 0.02 % HCl, with gentle agitation  
1088 at room temperature. Slides and coverslips were then washed in ethanol (96 %) followed by  
1089 thorough washing in bi-distilled water, then dried with an air gun and stored at 4°C. Flow chambers  
1090 were prepared by affixing a silane-PEG-biotin coverslip to a silane-PEG slide using double-sided  
1091 tape.

1092

#### 1093 *Microtubule dynamics assays in vitro*

1094 Microtubule seeds were prepared at a final concentration of 10  $\mu$ M tubulin (20 % ATTO-647-  
1095 labelled tubulin and 80 % biotinylated tubulin) in BRB80 supplemented with 0.5 mM GMPCPP  
1096 (Jena Bioscience) for 45 minutes at 37°C. Seeds were incubated with 1  $\mu$ M Paclitaxel (Sigma) for  
1097 45 minutes at 37°C, centrifuged (50,000 rpm at 37°C for 15 min), resuspended in BRB80  
1098 supplemented with 1  $\mu$ M Paclitaxel and 0.5 mM GMPCPP, aliquoted and subsequently stored in  
1099 liquid nitrogen.

1100 Flow chambers were prepared by injecting subsequently 50  $\mu$ g/mL neutravidin (ThermoFisher),  
1101 BRB80, and microtubule seeds, then subsequently washing out unattached seeds with BRB80.  
1102 Reaction buffer containing Atto-565 labelled-tubulin (1:5 ratio labelled to unlabeled; 5  $\mu$ M for all  
1103 assays except for Figure S6B, C) in BRB80 supplemented with an anti-bleaching buffer [10 mM  
1104 DTT, 0.3 mg/mL glucose, 0.1 mg/mL glucose oxidase, 0.02 mg/mL catalase, 0.125 % methyl  
1105 cellulose (1500 cP, Sigma), 1 mM GTP] was subsequently injected, and chambers were sealed  
1106 with silicon grease and immediately imaged. For “low salt” assays (Figure 6E-F), the reaction  
1107 buffer was supplemented with 60 mM potassium chloride. For “high salt” assays (Figure 6A-B),  
1108 the reaction buffer was supplemented with 60 mM potassium chloride and 85 mM potassium  
1109 acetate to facilitate tip tracking as described previously (Telley et al., 2011).

1110 For assays involving recombinant EB3 and H1- or H2-CLIP-170, purified proteins were flash-  
1111 thawed and spun at 50,000 rpm in a TLA-100 centrifuge at 4°C for 15 minutes to remove any large  
1112 aggregates. Proteins were diluted into BRB80 immediately prior to their usage, and further diluted  
1113 to the appropriate concentration in reaction buffer. Assays involving FL-CLIP-170 were carried  
1114 out as noted above, but within the first 5 hours post-purification as FL-CLIP-170 activity is poorly  
1115 preserved after freezing (Telley et al., 2011).

1116

### 1117 *Comparison between mCherry- and GFP-CLIP expression vs condensation phenotypes*

1118 Cells were plated on 96 well plates and transfected using the TransIT-X2 (Mirus) transfection  
1119 reagent with 0.075 µg DNA per well according to the manufacturer's instructions. Images were  
1120 acquired using a confocal automated microscope (Molecular Device) with a 60X water objective.  
1121 The first 100 cells observed for each experiment were binned according to their condensation  
1122 phenotype, as detailed in Figure S2A and B.

1123

### 1124 *SDS-PAGE and Western blot*

1125 Purified proteins or cell lysates were boiled, diluted into sample buffer containing Coomassie dye  
1126 and x % SDS, and run on gels containing 10% Agarose. After protein separation, gels were stained  
1127 with QuickBlue Protein Stain Coomassie dye (Lubio Science) for at least 2 hours before destaining  
1128 in water.

1129 Cell lysates were boiled run on SDS-PAGE gels (10% acrylamide) and subsequently transferred  
1130 to a nitrocellulose membrane using an iBLOT 2 Gel Transfer Device (ThermoFisher Scientific,  
1131 IB21001). Nitrocellulose membranes were blocked for 1 h with 5 % dried milk resuspended in  
1132 TBS-Tween 1 %, then incubated over-night with primary antibodies: anti-beta-tubulin (Sigma,  
1133 T6074, 1:1000 dilution) anti-EB3 (ATLAS anti-MAPRE3, HPA-009263, 1:500 dilution), or anti-  
1134 CLIP-170 (Santa Cruz Biotechnology, SC-28325, 1:1000 dilution). The following day, unbound  
1135 antibodies were washed off with TBS-Tween 1%, and membranes were incubated with secondary  
1136 antibodies conjugated to horseradish peroxidase (anti-mouse or anti-rabbit; GE Healthcare  
1137 17097199 and 16951542, 1:5000 dilution) for 1 hour at room temperature. Following secondary  
1138 antibody incubation, membranes were washed extensively with TBS-Tween 1% and imaged using  
1139 an ECL Western blotting detection kit (Advansta) and with Fusion Solo Vilber Lourmat camera  
1140 (Witec ag).

1141

### 1142 *Statistical analysis*

1143 Statistical analyses were carried out using GraphPad Prism software v9 as described in figure  
1144 legends. Unless otherwise noted, analyses were carried out between experimental means using  
1145 one-way ANOVA Fisher's LSD test, or two-tailed Student's t-test. P-values less than 0.05 were  
1146 considered statistically significant.

1147

## 1148 **References**

1149

- 1150 Akhmanova, A., & Steinmetz, M. O. (2010). Microtubule +TIPs at a glance. *J Cell Sci*, 123(Pt  
1151 20), 3415-3419. <https://doi.org/10.1242/jcs.062414>  
1152
- 1153 Akhmanova, A., & Steinmetz, M. O. (2015). Control of microtubule organization and dynamics:  
1154 two ends in the limelight. *Nat Rev Mol Cell Biol*, 16(12), 711-726.  
1155 <https://doi.org/10.1038/nrm4084>  
1156
- 1157 Alberti, S., & Dormann, D. (2019). Liquid–Liquid Phase Separation in Disease. *Annual Review*  
1158 *of Genetics*, 53(1), 171-194. <https://doi.org/10.1146/annurev-genet-112618-043527>  
1159
- 1160 Andreu-Carbó M., Fernandes S., Velluz M. C., Kruse K., Aumeier C. (2022). Motor usage  
1161 imprints microtubule stability along the shaft. *Dev Cell*, 57(1):5-18.e8. doi:  
1162 <https://doi.org/10.1016/j.devcel.2021.11.019>  
1163
- 1164 Arnal, I., Heichette, C., Diamantopoulos, G. S., & Chretien, D. (2004). CLIP-170/tubulin-curved  
1165 oligomers coassemble at microtubule ends and promote rescues. *Curr Biol*, 14(23), 2086-2095.  
1166 <https://doi.org/10.1016/j.cub.2004.11.055>  
1167
- 1168 Bieling P., Laan L., Schek H., Munteanu E. L., Sandblad L., Dogterom M., Brunner D., Surrey  
1169 T. (2007). Reconstitution of a microtubule plus-end tracking system in vitro. *Nature*,  
1170 13;450(7172):1100-5. <https://doi.org/10.1038/nature06386>  
1171
- 1172 Bieling P., Kandels-Lewis S., Telley I. A., van Dijk J., Janke, C., & Surrey, T. (2008). CLIP-170  
1173 tracks growing microtubule ends by dynamically recognizing composite EB1/tubulin-binding  
1174 sites. *J Cell Biol*, 183(7), 1223-1233. <https://doi.org/10.1083/jcb.200809190>  
1175
- 1176 Bjelić S., De Groot C. O., Schäfer M. A., Jaussi R., Bargsten K., Salzman M., Frey D., Capitani  
1177 G., Kammerer R. A., Steinmetz M. O. (2012). Interaction of mammalian end binding proteins  
1178 with CAP-Gly domains of CLIP-170 and p150(glued). *J Struct Biol*, 177(1):160-7.  
1179 <https://doi.org/10.1016/j.jsb.2011.11.010>  
1180
- 1181 Boeynaems, S., Alberti, S., Fawzi, N. L., Mittag, T., Polymenidou, M., Rousseau, F.,  
1182 Schymkowitz, J., Shorter, J., Wolozin, B., Van Den Bosch, L., Tompa, P., & Fuxreiter, M.  
1183 (2018). Protein Phase Separation: A New Phase in Cell Biology. *Trends Cell Biol*, 28(6), 420-  
1184 435. <https://doi.org/10.1016/j.tcb.2018.02.004>
- 1185 Brouhard, G. J. (2015). Dynamic instability 30 years later: complexities in microtubule growth  
1186 and catastrophe. *Mol Biol Cell*. 26(7), 1207-1210. <https://doi.org/10.1091/mbc.E13-10-0594>
- 1187 Brouhard, G. J., & Rice, L. M. (2018). Microtubule dynamics: an interplay of biochemistry and  
1188 mechanics. *Nat Rev Mol Cell Biol*, 19(7), 451-463. <https://doi.org/10.1038/s41580-018-0009-y>  
1189
- 1190 Brouhard, G. J., Stear, J. H., Noetzel, T. L., Al-Bassam, J., Kinoshita, K., Harrison, S. C.,  
1191 Howard, J., & Hyman, A. A. (2008). XMAP215 is a processive microtubule polymerase. *Cell*,  
1192 132(1), 79-88. <https://doi.org/10.1016/j.cell.2007.11.043>  
1193



- 1194 Chen, J., Kholina, E., Szyk, A., Fedorov, V. A., Kovalenko, I., Gudimchuk, N., & Roll-Mecak,  
1195 A. (2021). alpha-tubulin tail modifications regulate microtubule stability through selective  
1196 effector recruitment, not changes in intrinsic polymer dynamics. *Dev Cell*.  
1197 <https://doi.org/10.1016/j.devcel.2021.05.005>  
1198
- 1199 De Forges, H., Pilon, A., Cantaloube, I., Pallandre, A., Haghiri-Gosnet, A., Perez, F., and Poüs,  
1200 C. (2016). Localized Mechanical Stress Promotes Microtubule Rescue. *Current Biology* 2016  
1201 Dec 19; 26(24) 3399-3406. <https://doi.org/10.1016/j.cub.2016.10.048>  
1202
- 1203 Diamantopoulos, G. S., Perez, F., Goodson, H. V., Batelier, G., Melki, R., Kreis, T. E., &  
1204 Rickard, J. E. (1999). Dynamic localization of CLIP-170 to microtubule plus ends is coupled to  
1205 microtubule assembly. *J Cell Biol*, 144(1), 99-112. <https://doi.org/10.1083/jcb.144.1.99>  
1206
- 1207 Dixit, R., Barnett, B., Lazarus, J. E., Tokito, M., Goldman, Y. E., & Holzbaur, E. L. (2009).  
1208 Microtubule plus-end tracking by CLIP-170 requires EB1. *Proc Natl Acad Sci U S A*, 106(2),  
1209 492-497. <https://doi.org/10.1073/pnas.0807614106>  
1210
- 1211 Drechsel D.N., and Kirschner M. W. (1994) The minimum GTP cap required to stabilize  
1212 microtubules. *Curr Biol*, 1;4(12):1053-61. [https://doi.org/10.1016/s0960-9822\(00\)00243-8](https://doi.org/10.1016/s0960-9822(00)00243-8).  
1213
- 1214 Duellberg, C., Trokter, M., Jha, R., Sen, I., Steinmetz, M. O., & Surrey, T. (2014).  
1215 Reconstitution of a hierarchical +TIP interaction network controlling microtubule end tracking of  
1216 dynein. *Nat Cell Biol*, 16(8), 804-811. <https://doi.org/10.1038/ncb2999>  
1217
- 1218 Folker, E. S., Baker, B. M., and Goodson, H. V. (2005) Interactions between CLIP-170, tubulin,  
1219 and microtubules: implications for the mechanism of Clip-170 plus-end tracking behavior. *Mol*  
1220 *Biol Cell* 2005 Nov; 16(11):5373-84. <https://doi.org/10.1091/mbc.e04-12-1106>  
1221
- 1222 Ford, L. K., and Fioriti, L. (2020) Coiled-Coil Motifs of RNA-Binding Proteins: Dynamicity in  
1223 RNA Regulation. *Front Cell Dev Biol*. <https://doi.org/10.3389/fcell.2020.607947>  
1224
- 1225 Galjart, N. (2010). Plus-end-tracking proteins and their interactions at microtubule ends. *Curr*  
1226 *Biol*, 20(12), R528-537. <https://doi.org/10.1016/j.cub.2010.05.022>  
1227
- 1228 Gard, D. L., & Kirschner, M. W. (1987). A microtubule-associated protein from *Xenopus* eggs  
1229 that specifically promotes assembly at the plus-end. *J Cell Biol*, 105(5), 2203-2215.  
1230 <https://doi.org/10.1083/jcb.105.5.2203>  
1231
- 1232 Goodson, H. V., Skube, S. B., Stalder, R., Valetti, C., Kreis, T. E., Morrison, E. E., & Schroer, T.  
1233 A. (2003). CLIP-170 interacts with dynactin complex and the APC-binding protein EB1 by  
1234 different mechanisms. *Cell Motil Cytoskeleton*, 55(3), 156-173.  
1235 <https://doi.org/10.1002/cm.10114>  
1236
- 1237 Gudimchuk N. B., & McIntosh J. R. (2021). Regulation of microtubule dynamics, mechanics and  
1238 function through the growing tip. *Nat Rev Mol Cell Biol*. 22(12):777-795.  
1239 <https://doi.org/10.1038/s41580-021-00399-x>

- 1240  
1241 Gupta, K. K., Joyce, M. V., Slabbekoorn, A. R., Zhu, Z. C., Paulson, B. A., Boggess, B., &  
1242 Goodson, H. V. (2010). Probing interactions between CLIP-170, EB1, and microtubules. *J Mol*  
1243 *Biol*, 395(5), 1049-1062. <https://doi.org/10.1016/j.jmb.2009.11.014>  
1244  
1245 Henrie, H., Bakhos-Douaihy, D., Cantaloube, I., Pilon, A., Talantikite, M., Stoppin-Mellet, V.,  
1246 Baillet, A., Pous, C., & Benoit, B. (2020). Stress-induced phosphorylation of CLIP-170 by JNK  
1247 promotes microtubule rescue. *J Cell Biol*, 219(7). <https://doi.org/10.1083/jcb.201909093>  
1248  
1249 Hernandez-Vega, A., Braun, M., Scharrel, L., Jahnel, M., Wegmann, S., Hyman, B. T., Alberti,  
1250 S., Diez, S., & Hyman, A. A. (2017). Local Nucleation of Microtubule Bundles through Tubulin  
1251 Concentration into a Condensed Tau Phase. *Cell Rep*, 20(10), 2304-2312.  
1252 <https://doi.org/10.1016/j.celrep.2017.08.042>  
1253  
1254 Howard, J., & Hyman, A. A. (2009). Growth, fluctuation and switching at microtubule plus ends.  
1255 *Nat Rev Mol Cell Biol*, 10(8), 569-574. <https://doi.org/10.1038/nrm2713>  
1256  
1257 Hyman AA, Weber CA, Jülicher F. Liquid-liquid phase separation in biology. *Annu Rev Cell*  
1258 *Dev Biol*. 2014;30:39-58. <https://doi.org/10.1146/annurev-cellbio-100913-013325>  
1259  
1260 Jiang, H., Wang, S., Huang, Y., He, X., Cui, H., Zhu, X., & Zheng, Y. (2015). Phase transition of  
1261 spindle-associated protein regulate spindle apparatus assembly. *Cell*, 163(1), 108-122.  
1262 <https://doi.org/10.1016/j.cell.2015.08.010>  
1263  
1264 Jiang, X., Ho, D. B. T., Mahe, K., Mia, J., Sepulveda, G., Antkowiak, M., Jiang, L., Yamada, S.,  
1265 & Jao, L. E. (2021). Condensation of pericentrin proteins in human cells illuminates phase  
1266 separation in centrosome assembly. *J Cell Sci*. <https://doi.org/10.1242/jcs.258897>  
1267  
1268 Jijumon, A. S., Bodakuntla, S., Genova, M., Bangera, M., Sackett, V., Besse, L., Maksut, F.,  
1269 Henriot, V., Magiera, M. M., Sirajuddin, M., and Janke, C. (2022). Lysate-based pipeline to  
1270 characterize microtubule-associated proteins uncovers unique microtubule behaviors. *Nat Cell*  
1271 *Bio* 24, 253-267. <https://doi.org/10.1038/s41556-021-00825-4>  
1272  
1273 King, M. R., & Petry, S. (2020). Phase separation of TPX2 enhances and spatially coordinates  
1274 microtubule nucleation. *Nat Commun*, 11(1), 270. <https://doi.org/10.1038/s41467-019-14087-0>  
1275  
1276 Komarova, Y., De Groot, C. O., Grigoriev, I., Gouveia, S. M., Munteanu, E. L., Schober, J. M.,  
1277 Honnappa, S., Buey, R. M., Hoogenraad, C. C., Dogterom, M., Borisy, G. G., Steinmetz, M. O.,  
1278 & Akhmanova, A. (2009). Mammalian end binding proteins control persistent microtubule  
1279 growth. *J Cell Biol*, 184(5), 691-706. <https://doi.org/10.1083/jcb.200807179>  
1280  
1281 Komarova, Y., Lansbergen, G., Galjart, N., Grosveld, F., Borisy, G. G., & Akhmanova, A.  
1282 (2005). EB1 and EB3 control CLIP dissociation from the ends of growing microtubules. *Mol*  
1283 *Biol Cell*, 16(11), 5334-5345. <https://doi.org/10.1091/mbc.e05-07-0614>  
1284

- 1285 Komarova, Y. A., Akhmanova, A. S., Kojima, S., Galjart, N., & Borisy, G. G. (2002).  
1286 Cytoplasmic linker proteins promote microtubule rescue in vivo. *J Cell Biol*, 159(4), 589-599.  
1287 <https://doi.org/10.1083/jcb.200208058>  
1288
- 1289 Kroschwald, S., Maharana, S., & Simon, A. (2017). Hexanediol: a chemical probe to investigate  
1290 the material properties of membrane-less compartments.  
1291 <https://doi.org/10.19185/MATTERS.201702000010>  
1292
- 1293 Larson A. G., Elnatan D., Keenen M. M., Trnka M. J., Johnston J. B., Burlingame A. L., Agard  
1294 D. A., Redding S., Narlikar G. J. (2017). Liquid droplet formation by HP1 $\alpha$  suggests a role for  
1295 phase separation in heterochromatin. *Nature*, 547(7662):236-240.  
1296 <https://doi.org/10.1038/nature22822>  
1297
- 1298 Maan, R., Reese, L., Volkov, V. A., King, M. R., van der Sluis, E., Andrea, N., Evers, W.,  
1299 Jakobi, A. J., and Dogterom, M. (2021). Multivalent interactions facilitate motor-dependent  
1300 protein accumulation at growing microtubule plus ends. *Biorxiv*.  
1301 <https://doi.org/10.1101/2021.09.14.460284>  
1302
- 1303 Meier, S. A., Farcas, A., Kumar, A., Ijavi, M., Bill, R. T., Stelling, J., Dufresne, E., Steinmetz,  
1304 M. O., and Barral, Y. (2021). High interaction valency ensures cohesion and persistence of a  
1305 microtubule +TIP body at the plus-end of a single specialized microtubule in yeast. *Biorxiv*.  
1306 <https://doi.org/10.1101/2021.09.13.460064>  
1307
- 1308 Mészáros B., Erdos G., Dosztányi Z. (2018). IUPred2A: context-dependent prediction of protein  
1309 disorder as a function of redox state and protein binding. *Nucleic Acids Res*, 2;46(W1):W329-  
1310 W337. <https://doi.org/10.1093/nar/gky384>  
1311
- 1312 Mitrea, D. M., and Kriwacki, R. W. (2016) Phase separation in biology; functional organization  
1313 of a higher order. *Cell Commun Signal* 14 (1). <https://doi.org/10.1186/s12964-015-0125-7>  
1314
- 1315 Mohan R., Katrukha E. A., Doodhi H., Smal I., Meijering E., Kapitein L. C., Steinmetz M. O.,  
1316 Akhmanova A. (2013) End-binding proteins sensitize microtubules to the action of microtubule-  
1317 targeting agents. *Proc Natl Acad Sci U S A*. 28;110(22):8900-5.  
1318 <https://doi.org/10.1073/pnas.1300395110>  
1319
- 1320 Montenegro Gouveia, S., Leslie, K., Kapitein, L. C., Buey, R. M., Grigoriev, I., Wagenbach, M.,  
1321 Smal, I., Meijering, E., Hoogenraad, C. C., Wordeman, L., Steinmetz, M. O., & Akhmanova, A.  
1322 (2010). In vitro reconstitution of the functional interplay between MCAK and EB3 at  
1323 microtubule plus ends. *Curr Biol*, 20(19), 1717-1722. <https://doi.org/10.1016/j.cub.2010.08.020>  
1324
- 1325 Mustyatsa, V. V., Kostarev, A. V., Tvorogova, A. V., Ataullakhanov, F. I., Gudimchuk, N. B., &  
1326 Vorobjev, I. A. (2019). Fine structure and dynamics of EB3 binding zones on microtubules in  
1327 fibroblast cells. *Mol Biol Cell*, 30(17), 2105-2114. <https://doi.org/10.1091/mbc.E18-11-0723>  
1328
- 1329 Nakamura S., Grigoriev I., Nogi T., Hamaji T., Cassimeris L., Mimori-Kiyosue Y. (2012).  
1330 Dissecting the nanoscale distributions and functions of microtubule-end-binding proteins EB1

- 1331 and ch-TOG in interphase HeLa cells. PLoS One. 7(12):e51442.  
1332 <https://doi.org/10.1371/journal.pone.0051442>  
1333  
1334 Perez, F., Diamantopoulos, G. S., Stalder, R., & Kreis, T. E. (1999). CLIP-170 highlights  
1335 growing microtubule ends in vivo. Cell, 96(4), 517-527. [https://doi.org/10.1016/s0092-](https://doi.org/10.1016/s0092-8674(00)80656-x)  
1336 [8674\(00\)80656-x](https://doi.org/10.1016/s0092-8674(00)80656-x)  
1337  
1338 Pierre, P., Pepperkok, R., & Kreis, T. E. (1994). Molecular characterization of two functional  
1339 domains of CLIP-170 in vivo. J Cell Sci, 107 ( Pt 7), 1909-1920.  
1340 <https://www.ncbi.nlm.nih.gov/pubmed/7983157>  
1341  
1342 Pierre, P., Scheel, J., Rickard, J. E., & Kreis, T. E. (1992). CLIP-170 links endocytic vesicles to  
1343 microtubules. Cell, 70(6), 887-900. [https://doi.org/10.1016/0092-8674\(92\)90240-d](https://doi.org/10.1016/0092-8674(92)90240-d)  
1344  
1345 Rickman, J., Duellberg, C., Cade, C. I., Griffin, L. D., and Surrey, T. (2017). Steady-state EB  
1346 cap size fluctuations are determined by stochastic microtubule growth and maturation. PNAS,  
1347 2017 March 28; 114 (13): 3427-3432. <https://doi.org/10.1073/pnas.1620274114>  
1348  
1349 Roth D., Fitton B. P., Chmel N. P., Wasiluk N., Straube A. (2018). Spatial positioning of EB  
1350 family proteins at microtubule tips involves distinct nucleotide-dependent binding properties. J  
1351 Cell Sci, 132(4):jcs219550. <https://doi.org/10.1242/jcs.219550>  
1352  
1353 Salisbury, S. (2003). Centrosomes: Coiled-Coils Organize the Cell Center. Current Biology 13  
1354 (3):88-90. [https://doi.org/10.1016/S0960-9822\(03\)00033-2](https://doi.org/10.1016/S0960-9822(03)00033-2)  
1355  
1356 Schek III, H. T., Gardner, M. K., Cheng, J., Odde, D. J., and Hunt, A. J. (2007). Microtubule  
1357 Assembly Dynamics at the Nanoscale. Current Biology 17 (17): 1445-1455.  
1358 <https://doi.org/10.1016/j.cub.2007.07.011>  
1359  
1360 Seetapun D, Castle BT, McIntyre AJ, Tran PT, Odde DJ. Estimating the microtubule GTP cap  
1361 size in vivo. Curr Biol. 2012 Sep 25;22(18):1681-7. <https://doi.org/10.1016/j.cub.2012.06.068>  
1362  
1363 Shin Y, Brangwynne CP. Liquid phase condensation in cell physiology and disease. Science.  
1364 2017 Sep 22;357(6357):eaaf4382. <https://doi.org/10.1126/science.aaf4382>  
1365  
1366 Song et al., 2022 (personal communications)  
1367  
1368 Srayko, M., Kaya, A., Stamford, J., & Hyman, A. A. (2005). Identification and characterization  
1369 of factors required for microtubule growth and nucleation in the early C. elegans embryo. Dev  
1370 Cell, 9(2), 223-236. <https://doi.org/10.1016/j.devcel.2005.07.003>  
1371  
1372 Strom A. R., Emelyanov A. V., Mir M., Fyodorov D. V., Darzacq X., Karpen G. H. (2017).  
1373 Phase separation drives heterochromatin domain formation. 13;547(7662):241-245.  
1374 <https://doi.org/10.1038/nature22989>  
1375  
1376

- 1377 Straube, A., & Merdes, A. (2007). EB3 regulates microtubule dynamics at the cell cortex and is  
1378 required for myoblast elongation and fusion. *Curr Biol*, 17(15), 1318-1325.  
1379 <https://doi.org/10.1016/j.cub.2007.06.058>  
1380
- 1381 Telley, I. A., Bieling, P., & Surrey, T. (2011). Reconstitution and quantification of dynamic  
1382 microtubule end tracking in vitro using TIRF microscopy. *Methods Mol Biol*, 777, 127-145.  
1383 [https://doi.org/10.1007/978-1-61779-252-6\\_10](https://doi.org/10.1007/978-1-61779-252-6_10)  
1384
- 1385 Vitre, B., Coquelle, F. M., Heichette, C., Garnier, C., Chretien, D., & Arnal, I. (2008). EB1  
1386 regulates microtubule dynamics and tubulin sheet closure in vitro. *Nat Cell Biol*, 10(4), 415-421.  
1387 <https://doi.org/10.1038/ncb1703>  
1388
- 1389 Voter, W. A., O'Brien, E. T., & Erickson, H. P. (1991). Dilution-induced disassembly of  
1390 microtubules: relation to dynamic instability and the GTP cap. *Cell Motil Cytoskeleton*, 18(1),  
1391 55-62. <https://doi.org/10.1002/cm.970180106>  
1392
- 1393 Walker, R. A., O'Brien, E. T., Pryer, N. K., Soboeiro, M. F., Voter, W. A., Erickson, H. P., &  
1394 Salmon, E. D. (1988). Dynamic instability of individual microtubules analyzed by video light  
1395 microscopy: rate constants and transition frequencies. *J Cell Biol*, 107(4), 1437-1448.  
1396 <https://doi.org/10.1083/jcb.107.4.1437>  
1397
- 1398 Wiśniewski, J. R., Hein, M. Y., Cox, J., and Mann, M. (2014). A “Proteomic Ruler” for Protein  
1399 Copy Number and Concentration Estimation without Spike-in Standards. *Molecular & Cellular*  
1400 *Proteomics* 13(12):3497-3506. <https://doi.org/10.1074/mcp.M113.037309>  
1401
- 1402 Woodruff, J. B., Ferreira Gomes, B., Widlund, P. O., Mahamid, J., Honigmann, A., & Hyman,  
1403 A. A. (2017). The Centrosome Is a Selective Condensate that Nucleates Microtubules by  
1404 Concentrating Tubulin. *Cell*, 169(6), 1066-1077 e1010.  
1405 <https://doi.org/10.1016/j.cell.2017.05.028>  
1406
- 1407 Wu, Y.-F. O., Bryant, A. T., Nelson, N. T., Madey, A. G., Fernandes, G. F., & Goodson, H. V.  
1408 (2021). Overexpression of the microtubule-binding protein CLIP-170 induces a +TIP network  
1409 superstructure consistent with a biomolecular condensate. *PLoS One*, 10;16(12):e0260401.  
1410 <https://doi.org/10.1371/journal.pone.0260401>.  
1411
- 1412 Yang, C., Wu, J., de Heus, C., Grigoriev, I., Liv, N., Yao, Y., Smal, I., Meijering, E.,  
1413 Klumperman, J., Qi, R. Z., & Akhmanova, A. (2017). EB1 and EB3 regulate microtubule minus  
1414 end organization and Golgi morphology. *J Cell Biol*, 216(10), 3179-3198.  
1415 <https://doi.org/10.1083/jcb.201701024>  
1416
- 1417 Zanic, M., Widlund, P. O., Hyman, A. A., & Howard, J. (2013). Synergy between XMAP215  
1418 and EB1 increases microtubule growth rates to physiological levels. *Nat Cell Biol*, 15(6), 688-  
1419 693. <https://doi.org/10.1038/ncb2744>  
1420

1421 Zhang R., Alushin G. M., Brown A., Nogales E. (2015). Mechanistic Origin of Microtubule  
1422 Dynamic Instability and Its Modulation by EB Proteins. *Cell*, 13;162(4):849-59. doi:  
1423 <https://doi.org/10.1016/j.cell.2015.07.012>  
1424  
1425  
1426  
1427  
1428  
1429
